# Supplementary material
Source: PubMed Central journal article supplement (PMC4331574)

**Figure S1.** The phylogenetic tree of ascidians using 18S rRNA gene sequences. Sequences obtained from this study are labeled with location (CA, FL, PNG, VN) and sample code. Other sequences were obtained from NCBI with the following accession numbers: *Megalocercus huxleyi* FM244868.1, *Herdmania litoralis* AB564300.1, *Pyura haustor* AY903926.1, *Pyura spinifera* JF961826.1, *Ecteinascidia turbinata* FM244848.1, *Phallusia fumigata* FM244844.1, *Ascidia ceratodes* L12378.2, *Aplidium pliciferum* AB211067.1, *Eudistoma gilboviride* AB211069.1, *Cystodytes* sp\_TG-2008 FM244842.1, *Lissoclinum badium* AB211078.1, *Lissoclinum bistratum* AB211084.1, *Lissoclinum patella* AB211085.1, *Didemnum* sp DidSB AB211073.1, *Trididemnum paracyclops* AB211077.1, *Didemnum molle* AB211071.1, *Didemnum* sp DidSA/57 AB211072.1

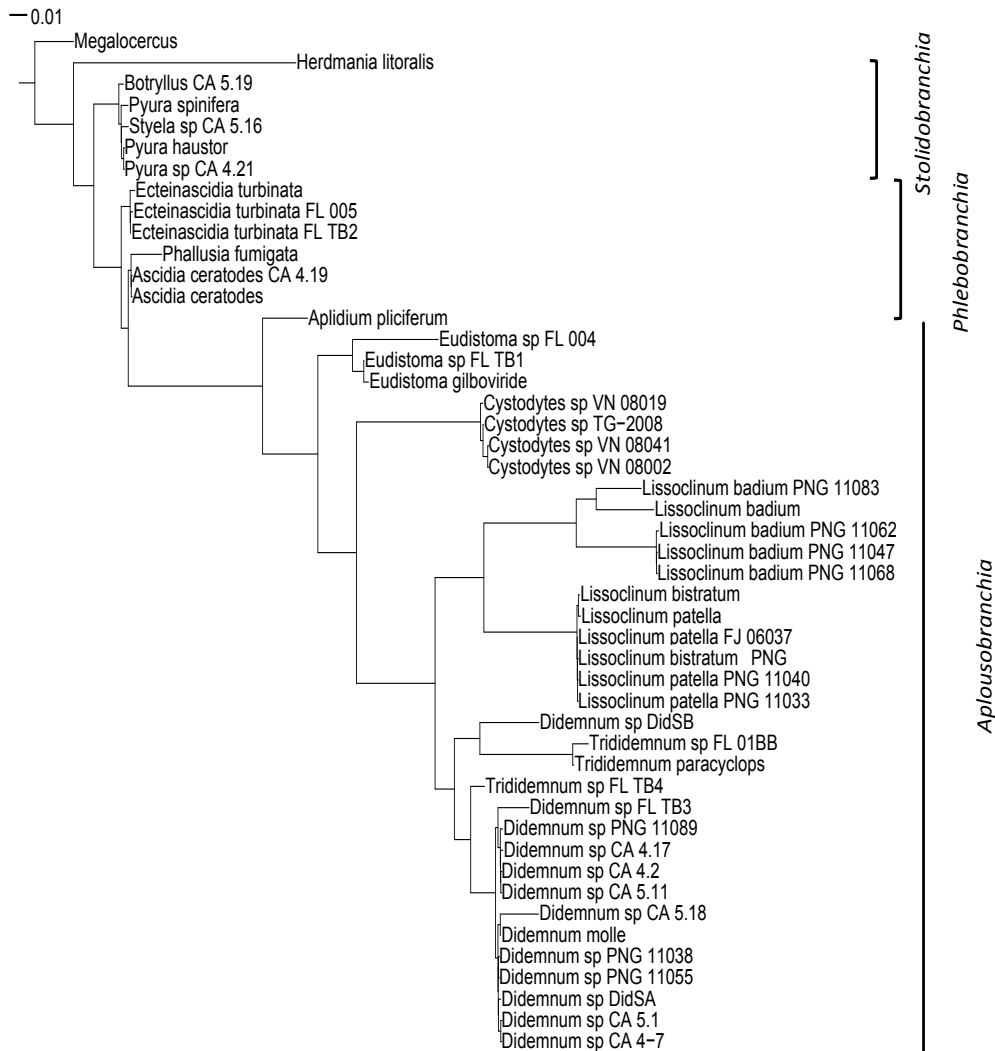

**Figure S2.** Abundance and order level composition of Deltaproteobacteria (A) and Gammaproteobacteria (B) showing ascidian species specificity of the most abundant groups. (C) Phylogeny of the top ten most abundant OTUs in *L. patella* and *E. turbinata* samples, arrows indicate known natural products producers. Bar plots and phylogenetic trees were generated using Phyloseq R package.

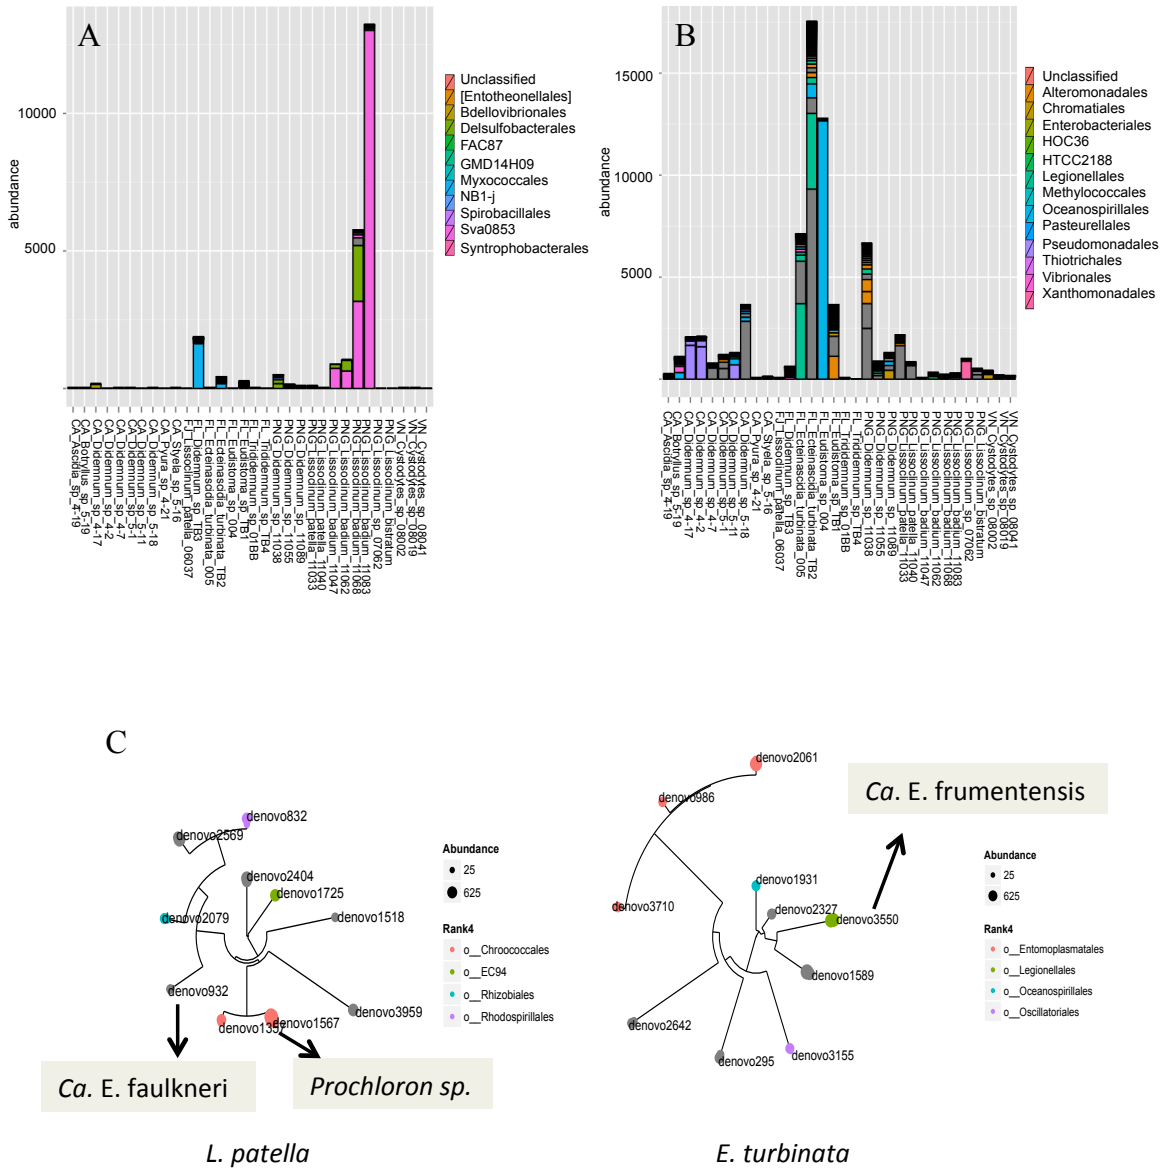

**Figure S3.** Effects of seasonal variation on the composition of ascidian microbiomes. The graph shows that the major phyla (filtered to top 20 percent) are maintained in ascidians collected from fall and spring of 2011 (x-axis), while the abundance of different species of bacteria varies.

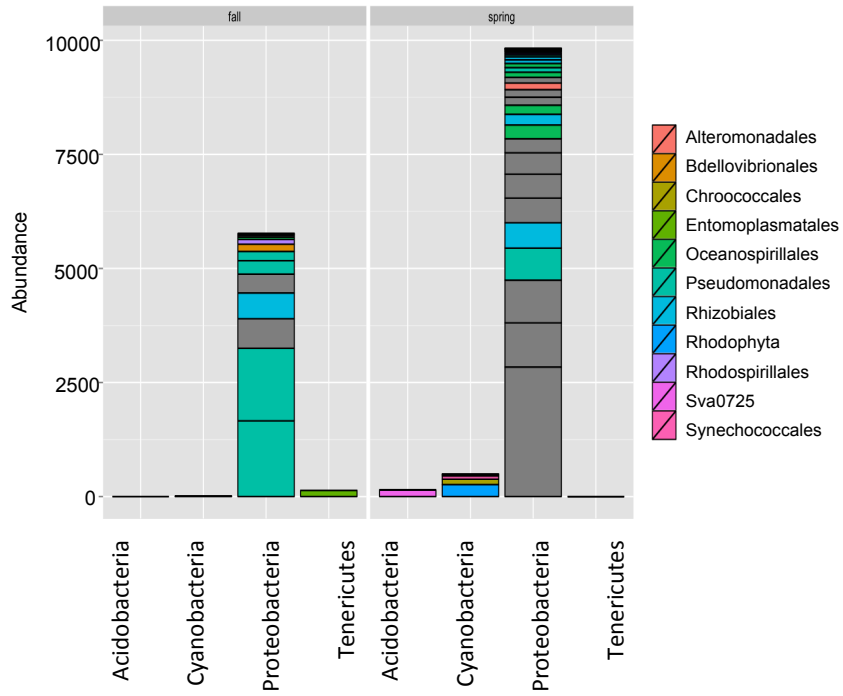

**Figure S4.** UniFrac-based 3D PCoA plots of all samples showing the clustering of samples according to (A) type of organisms (black: ascidians, red: mollusks) and (B) location (black: CA, green: FL, blue: PNG, light blue: VN, red: FJ).

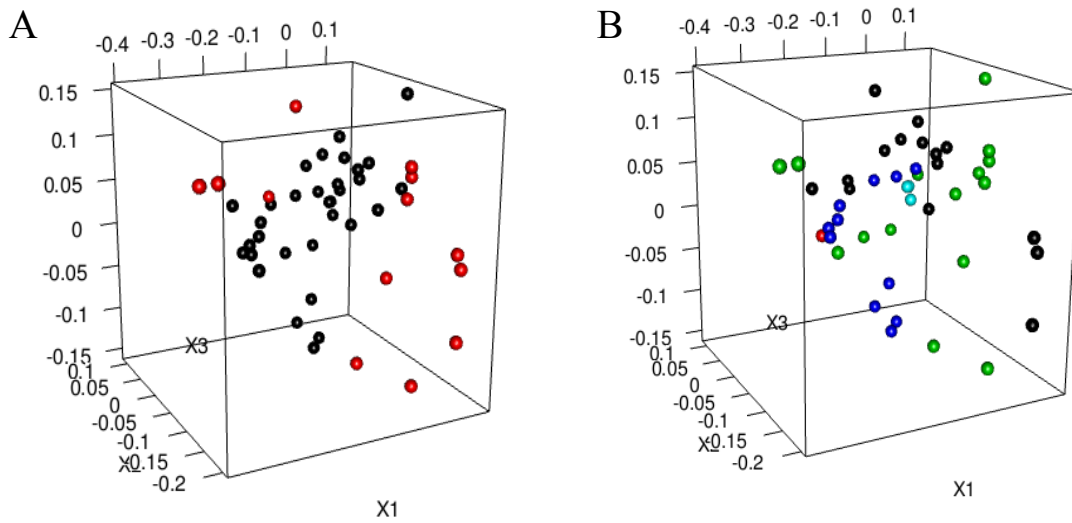



**Figure S6.** Example LC-MS/MS spectra of lipids that were correlated with extracts from different locations (PCA biplots are shown on the left panels). Compounds or compound families were identified by comparison of MS/MS fragmentation patterns and accurate masses to compounds in METLIN database (right panels).

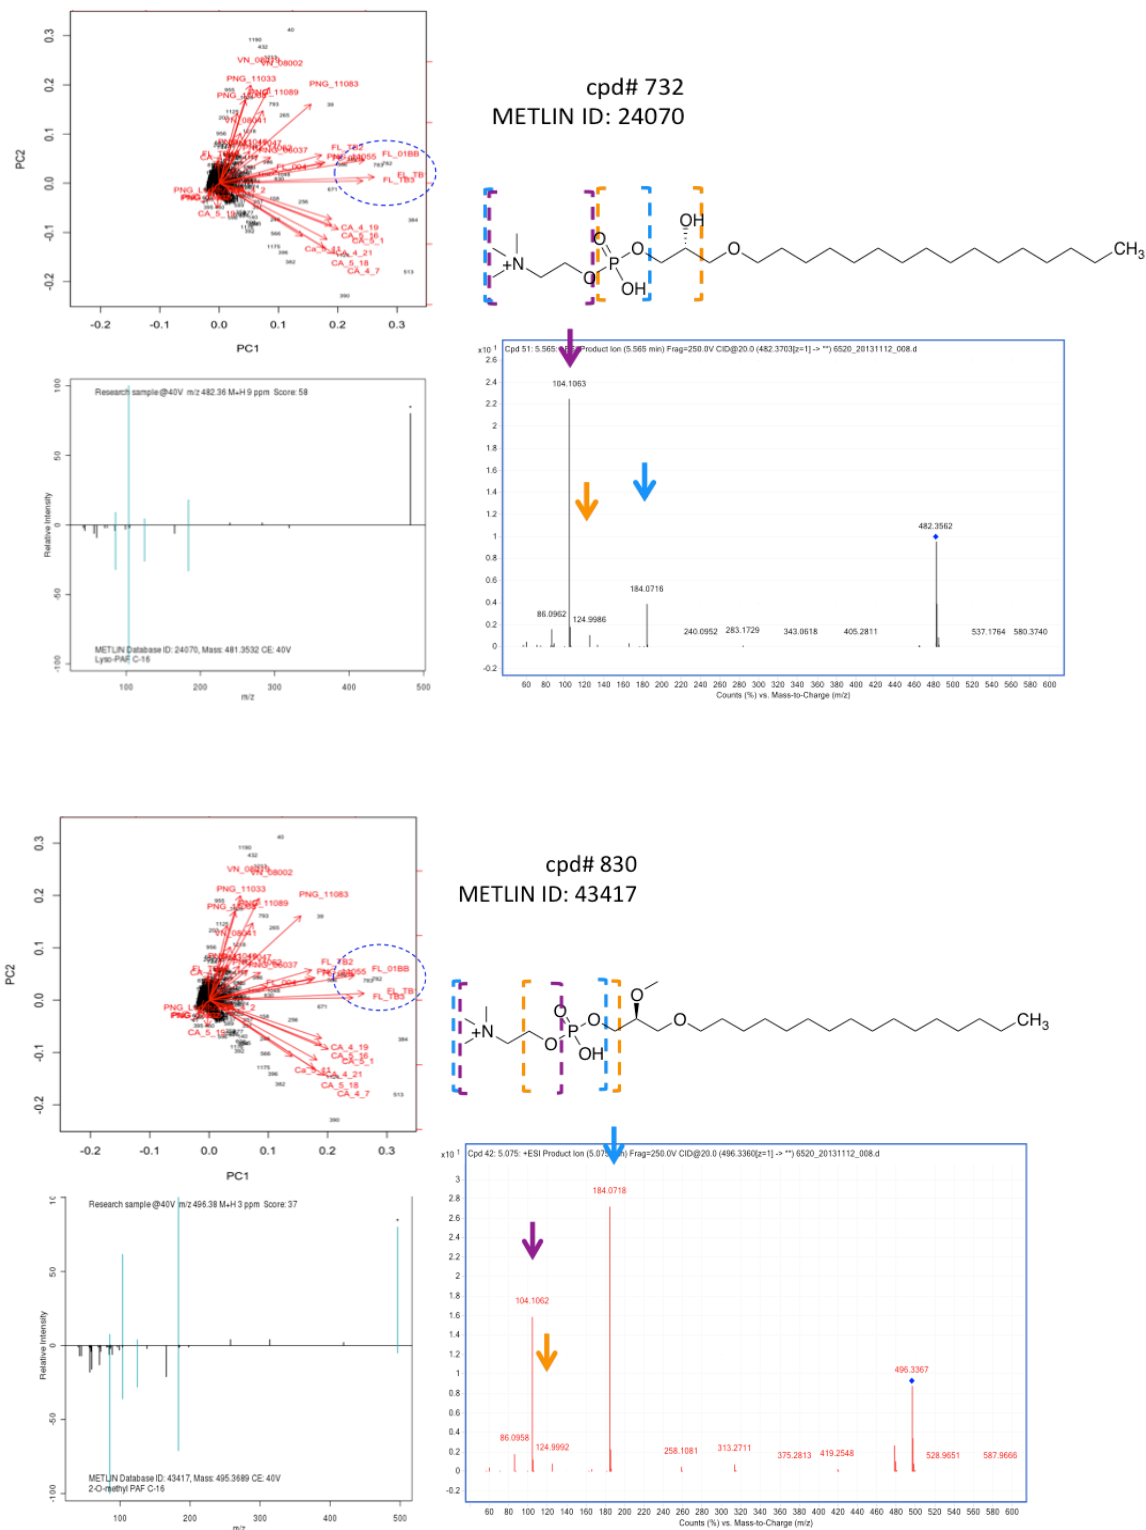

METLIN ID: 45057

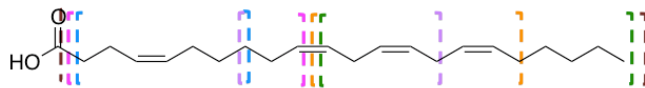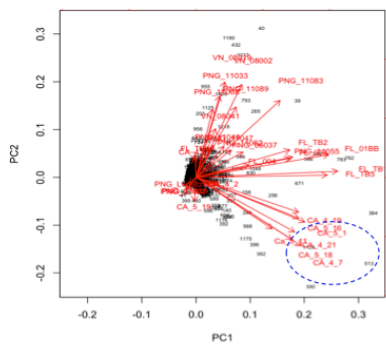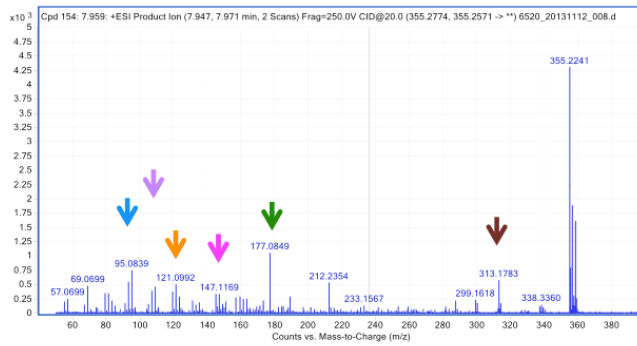

**Figure S7A.** PCA of samples from Papua New Guinea showing a clustering driven by secondary metabolites.

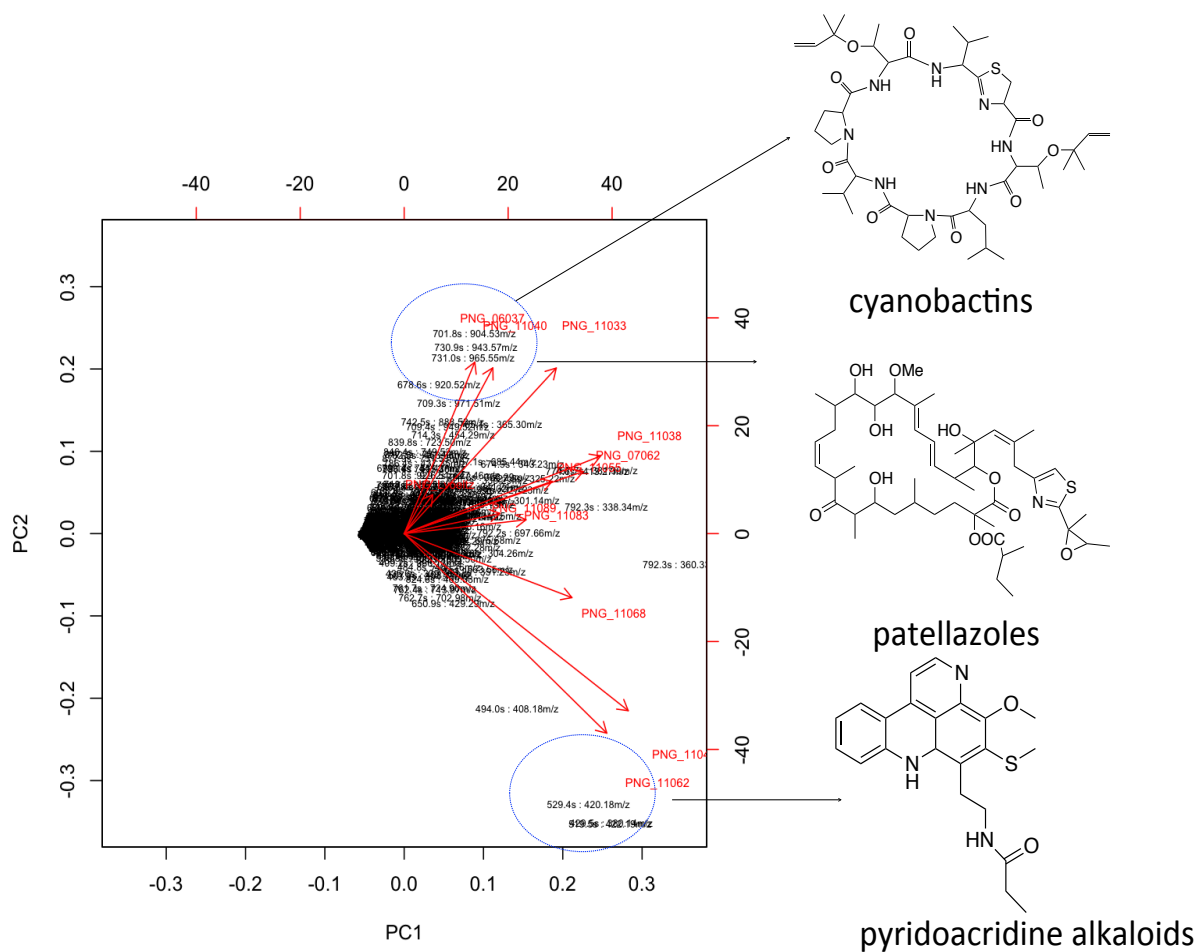



**Figure S7B.** Spectrum and selected ion chromatogram of varamine A from *Lissoclinum badium* samples.

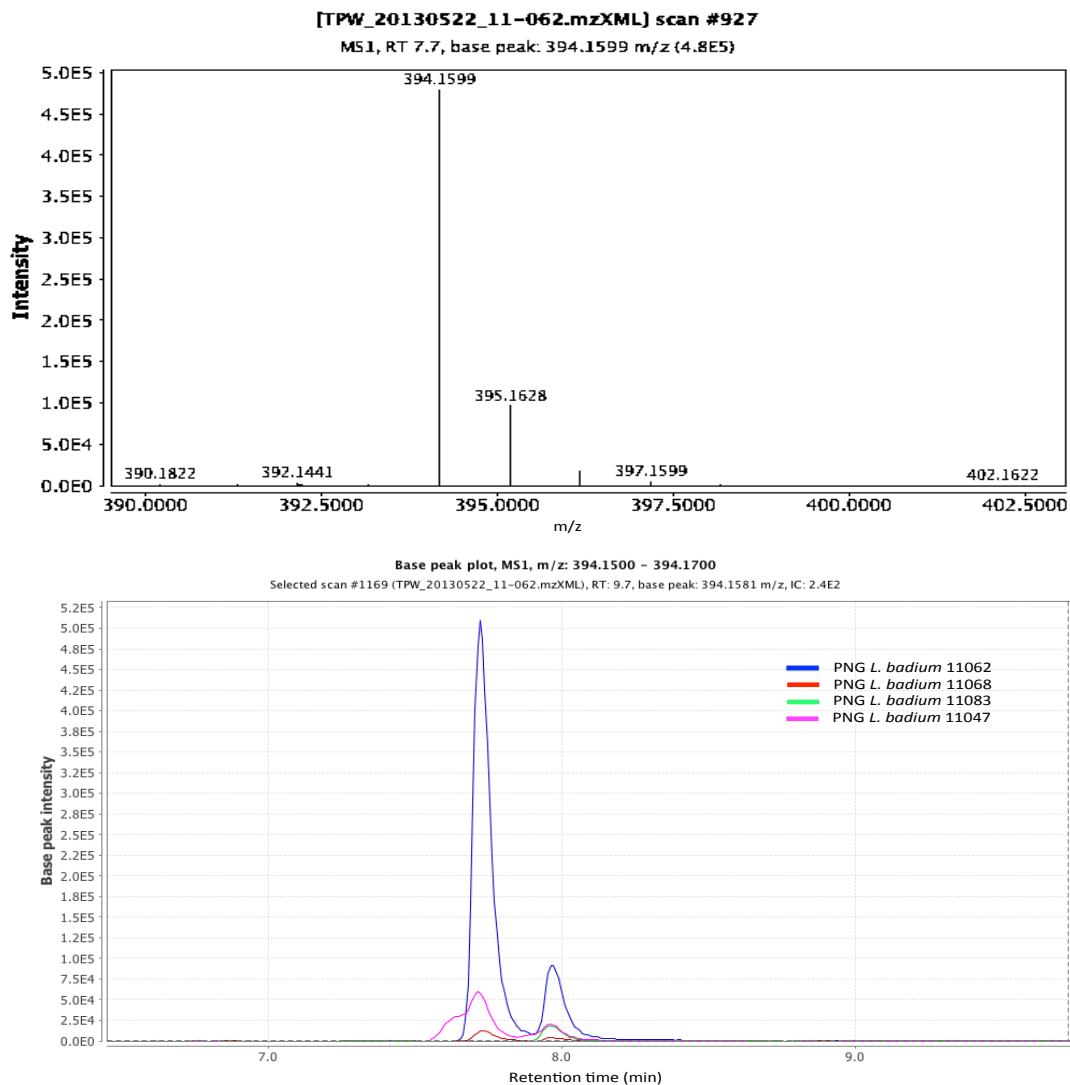

**Figure S7C.** Spectrum and selected ion chromatogram of varamine B from *Lissoclinum badium* samples.

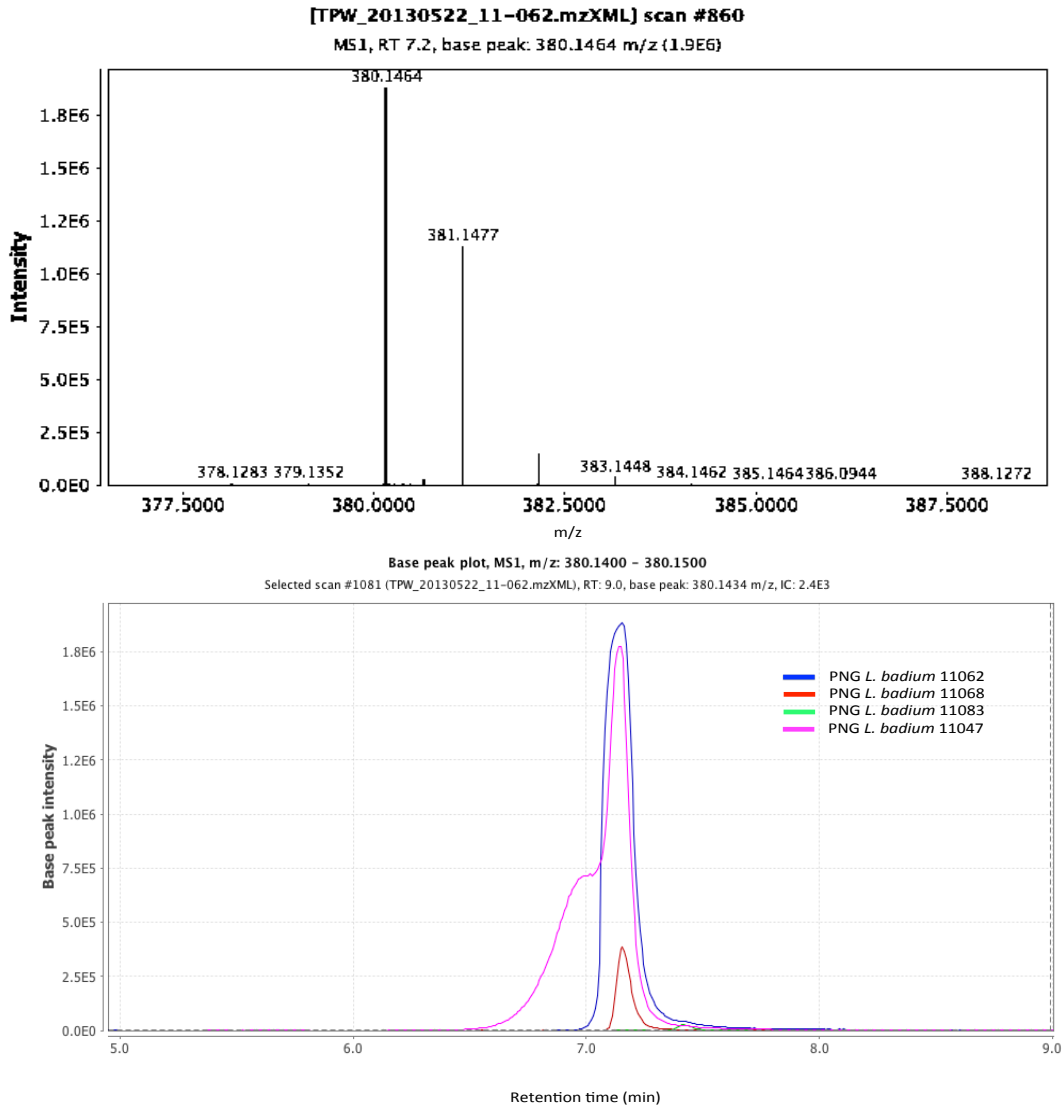

**Figure S7D.** Spectrum and selected ion chromatogram of diplamine from *Lissoclinum badium* samples.

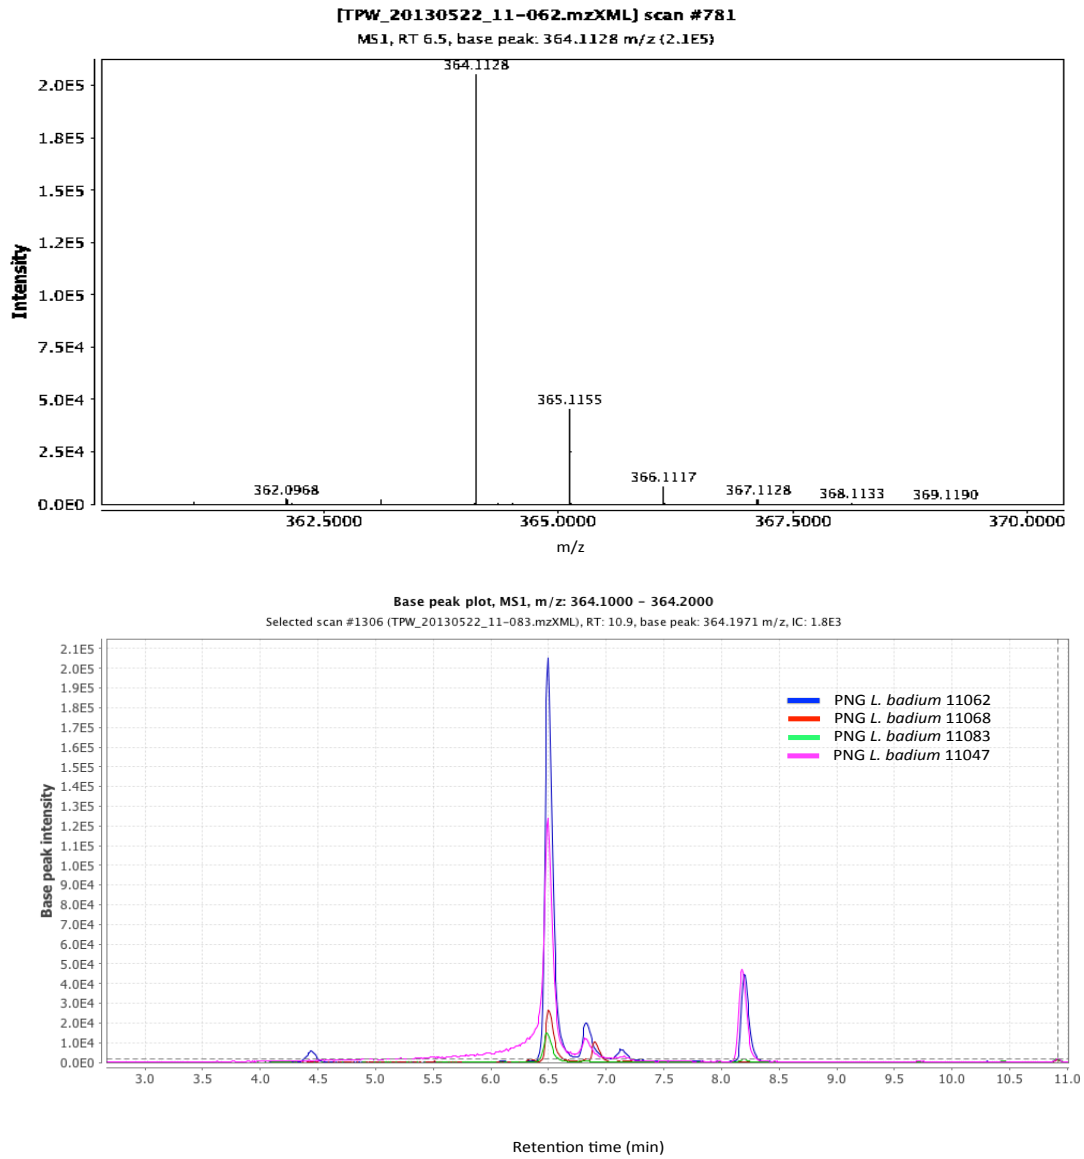

**Figure S7E.** Spectrum and selected ion chromatogram of lissoclinin B from *Lissoclinum badium* samples.

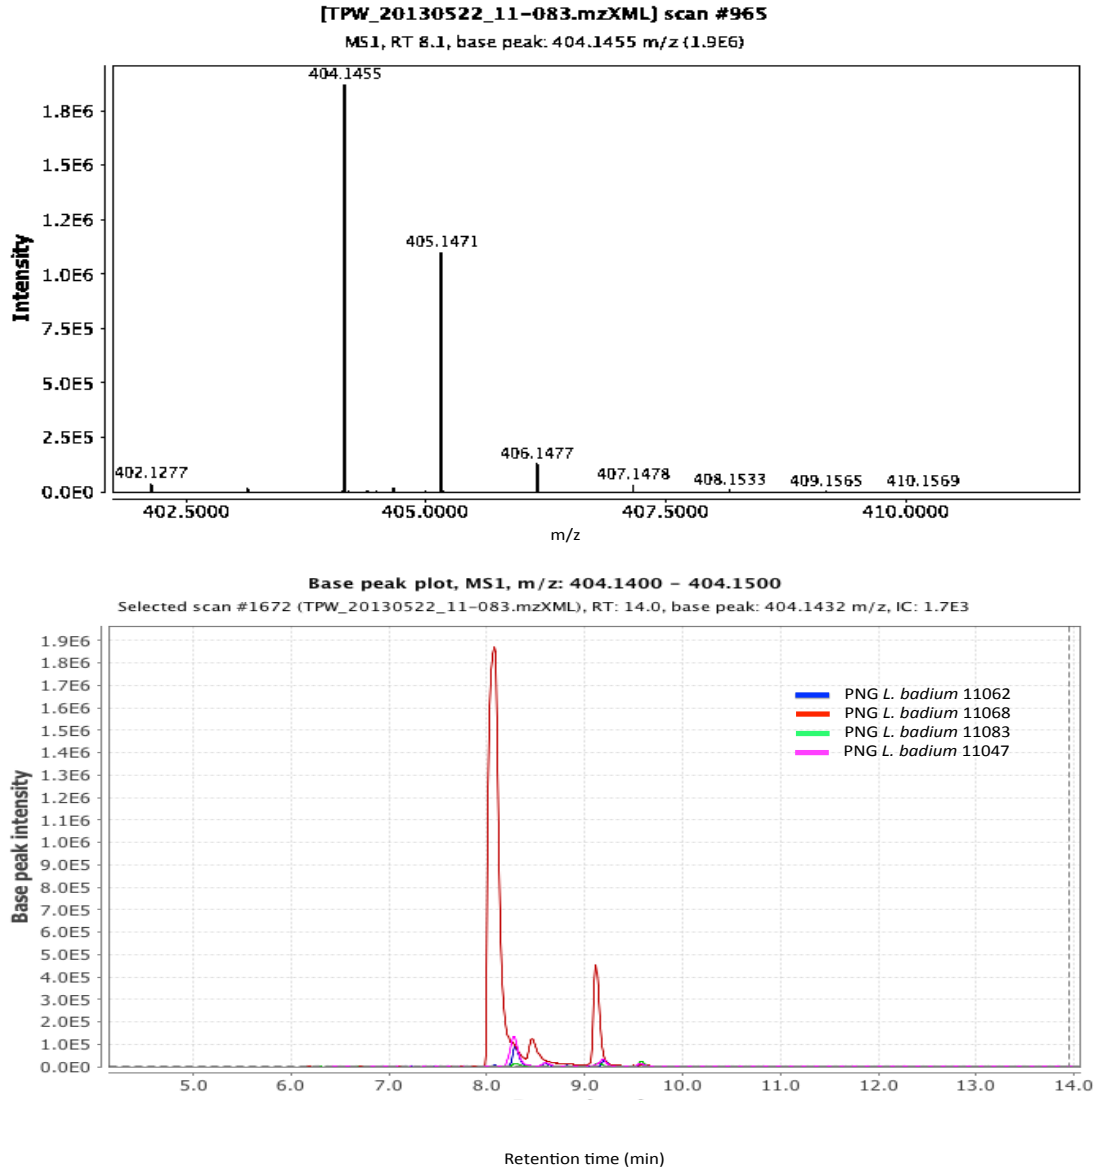

**Figure S7F.** Spectrum and selected ion chromatogram of patellazole A from *Lissoclinum patella* samples.

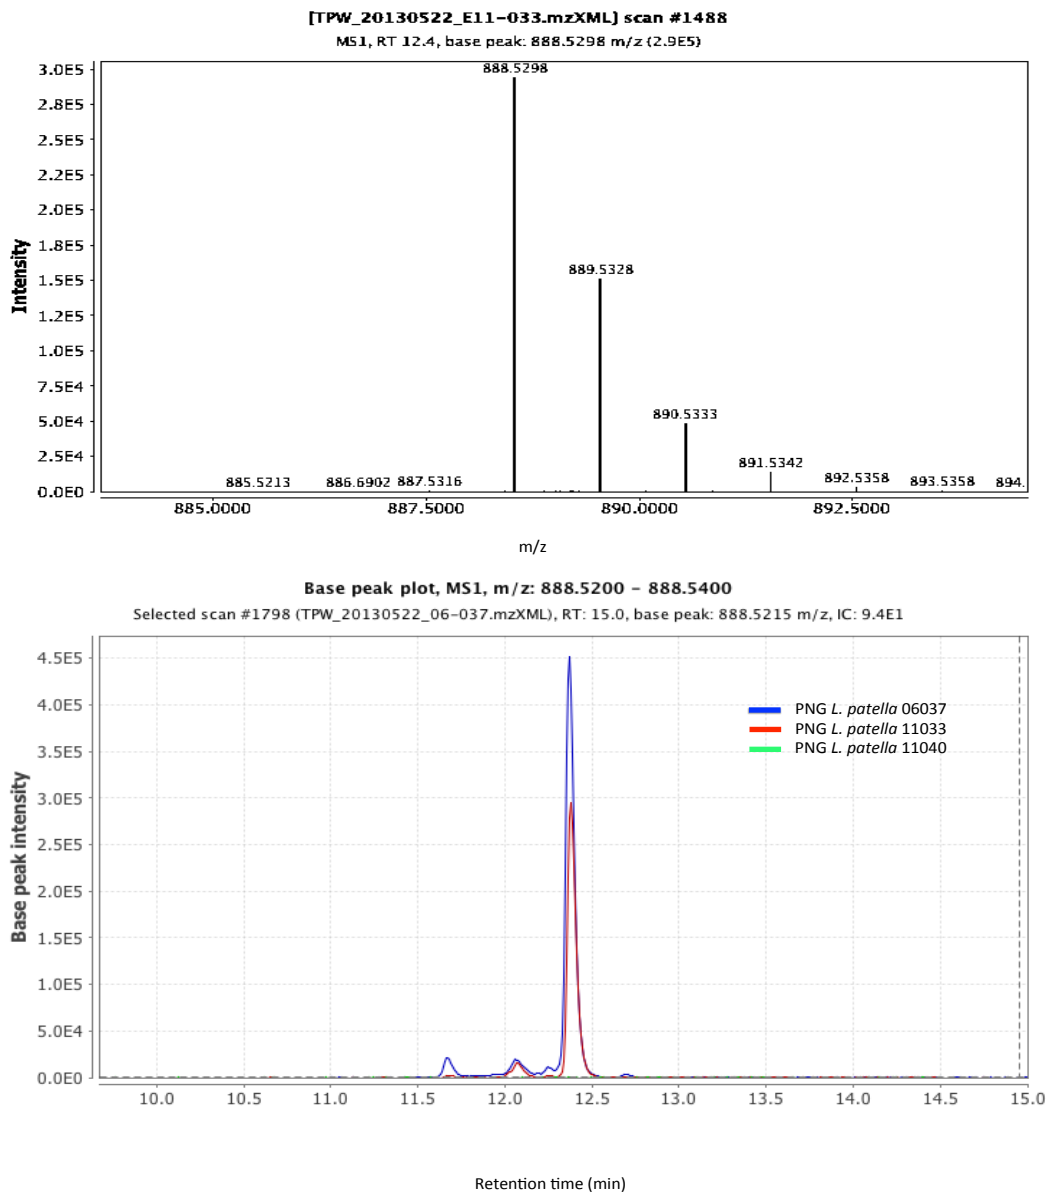

**Figure S7G.** Spectrum and selected ion chromatogram of patellin 3 from *Lissoclinum patella* samples.

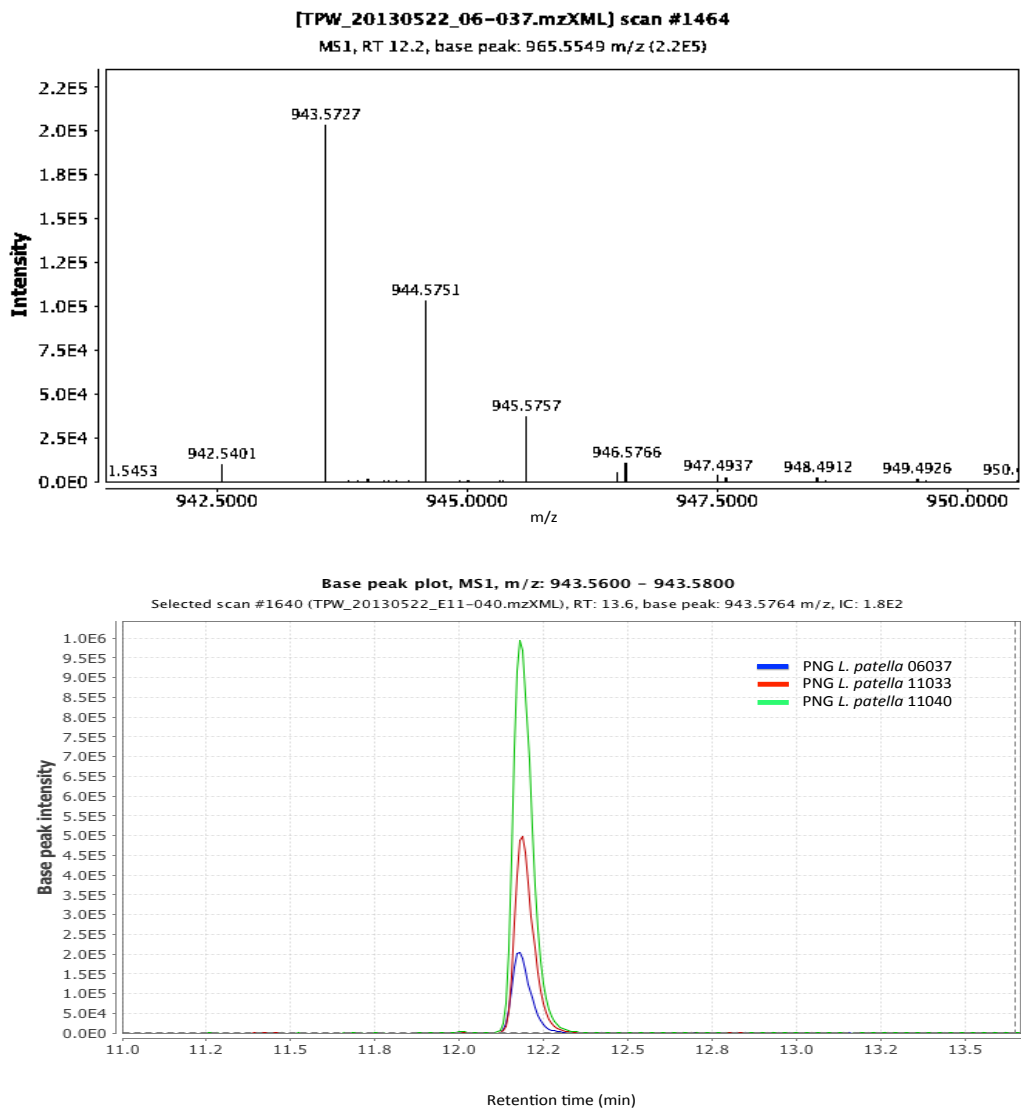

**Figure S7H.** Spectrum and selected ion chromatogram of cystodytin A from *Cystodytes* sp. samples.

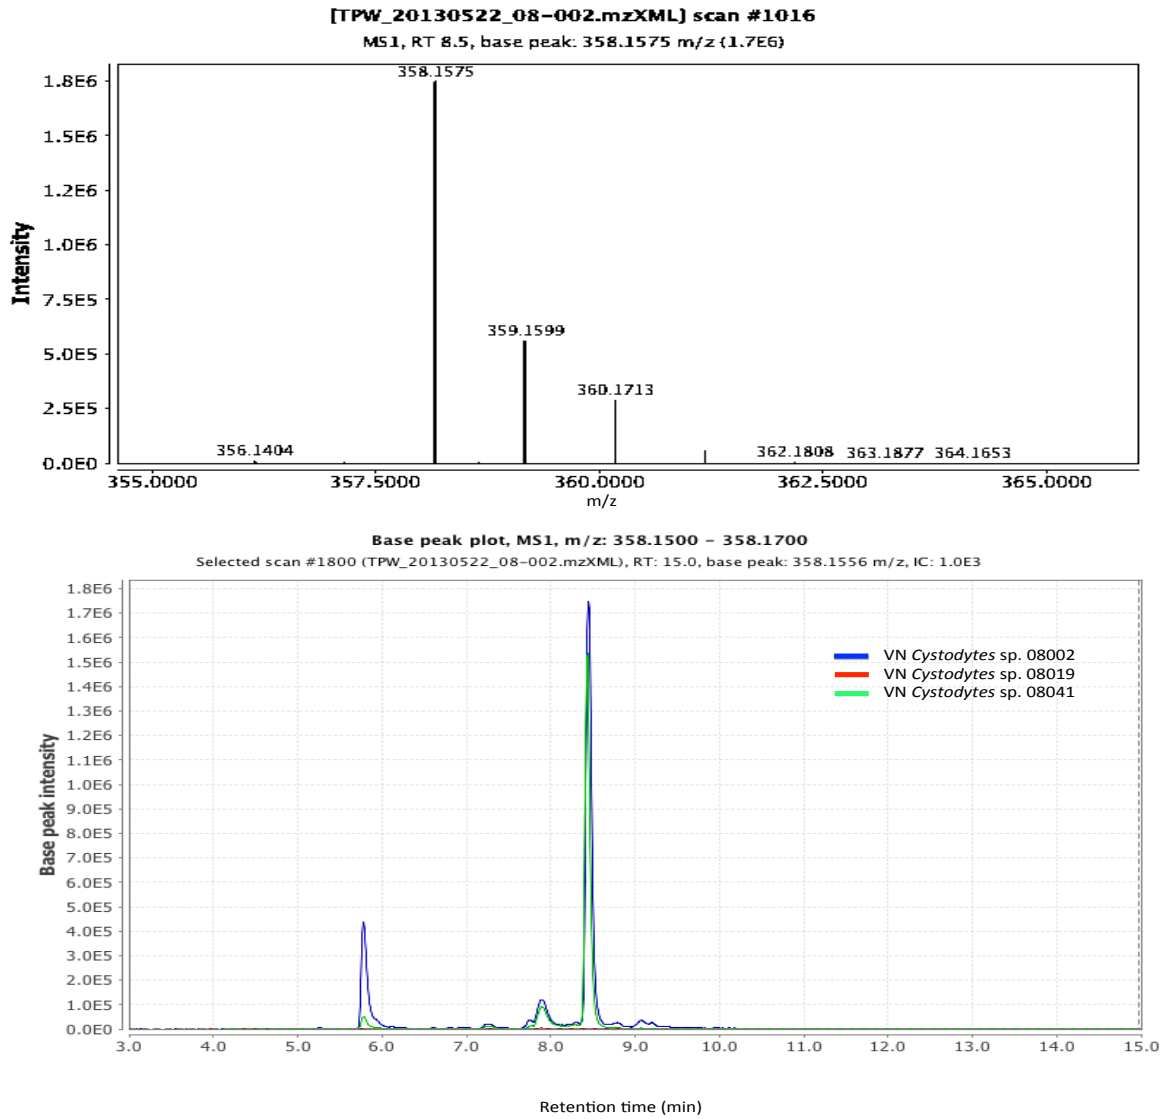

**Figure S7I.** Spectrum and selected ion chromatogram of cystodytin A from *Cystodytes* sp samples

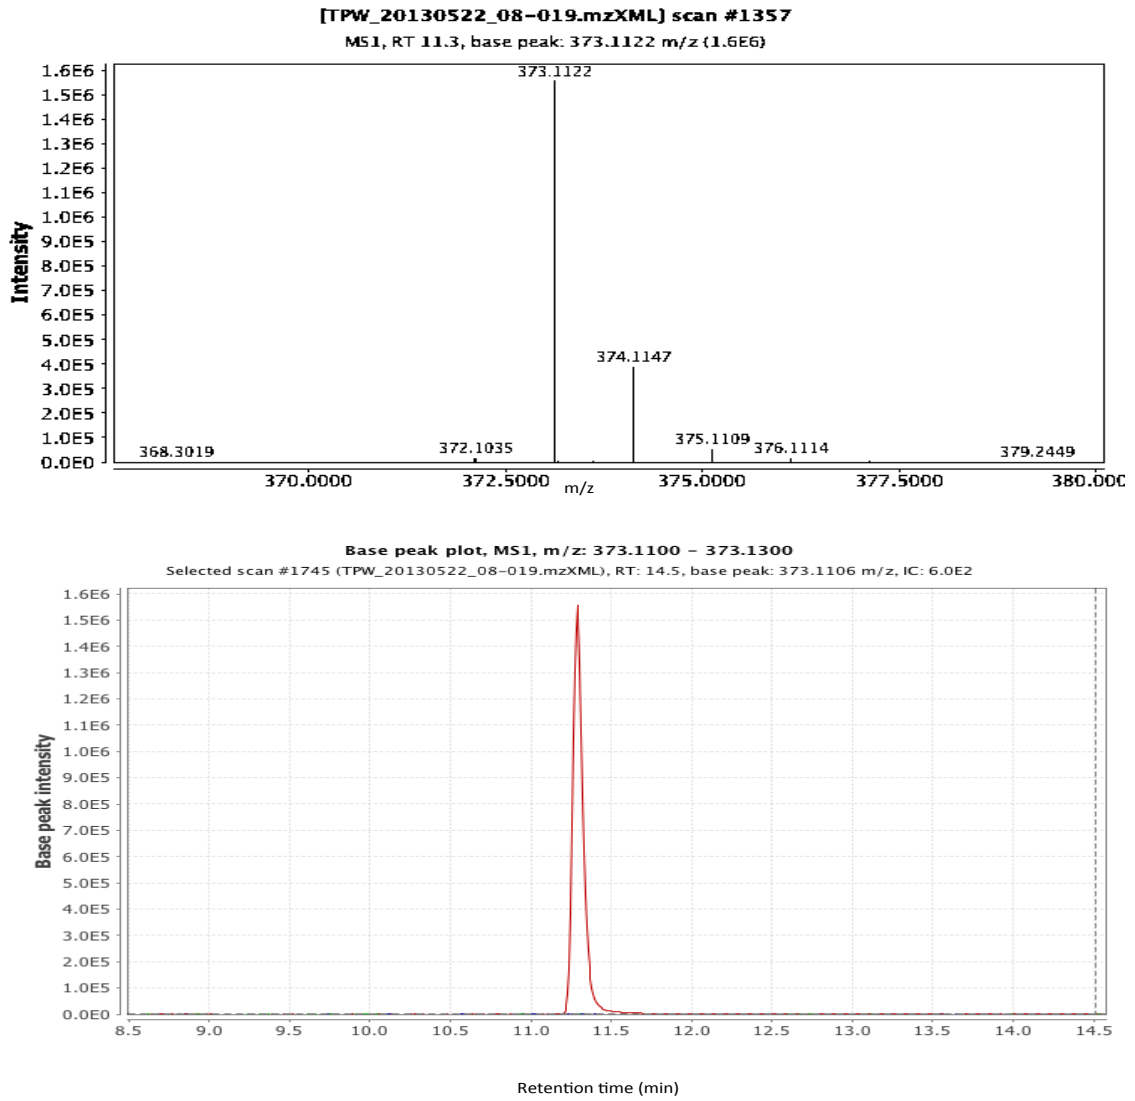



**Figure S8.** Bioactivity profile of ascidian extracts showing the distribution of bioactivity across different locations. Activities are shown as percent growth inhibition relative to standard compounds (see methods section).

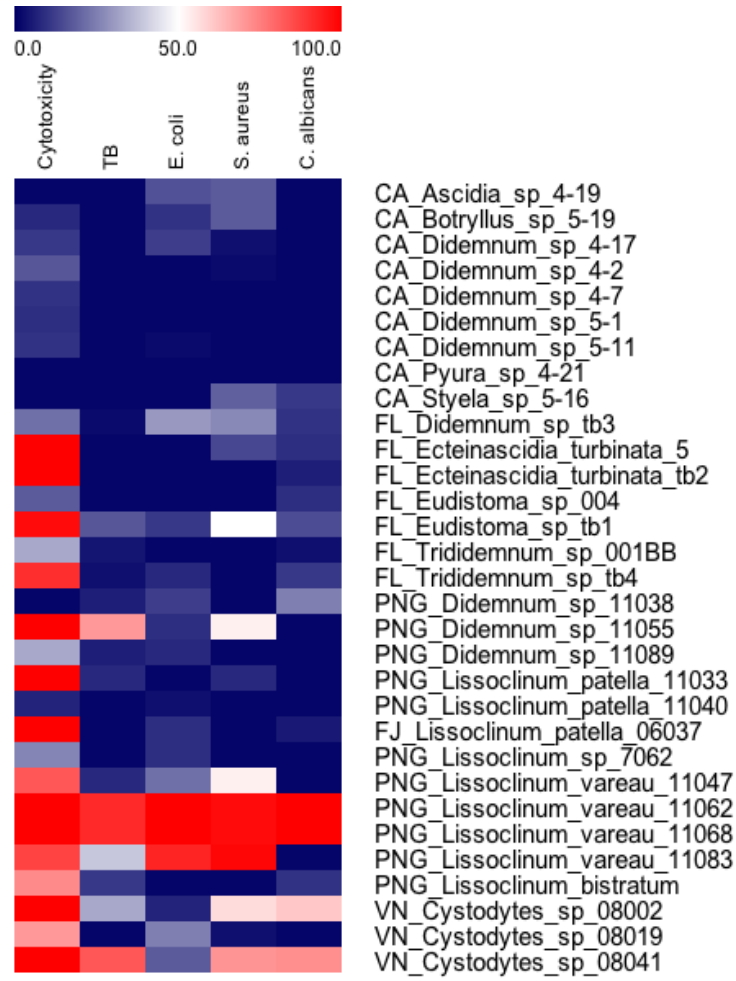

**Figure S9.** Group diversity analysis using the Shannon and Simpson indices. Calculations were made using the mcpHill function in the simboot R package. This function reports multiplicity adjusted p-values from distribution free tests (see methods for details).

| Location (number of samples)       | Pvalue(Shannon) | Pvalue(Simpson) |
|------------------------------------|-----------------|-----------------|
| CA (10)                            | 0.9958          | 0.9972          |
| FL (7)                             | 0.9564          | 0.6014          |
| PNG (15)                           | 0.9980          | 0.8104          |
| Host (number of samples)           |                 |                 |
| <i>Cystodytes sp.</i> (3)          | 1.0000          | 0.9994          |
| <i>Didemnum sp.</i> (6)            | 0.7678          | 0.6856          |
| <i>Didemnum sp._2</i> (3)          | 0.0082          | 0.0072          |
| <i>Ecteinascidia turbinata</i> (2) | 1.0000          | 0.9824          |
| <i>Lissoclinum badium</i> (4)      | 0.6970          | 0.8482          |
| <i>Lissoclinum patella</i> (3)     | 0.8678          | 0.7086          |

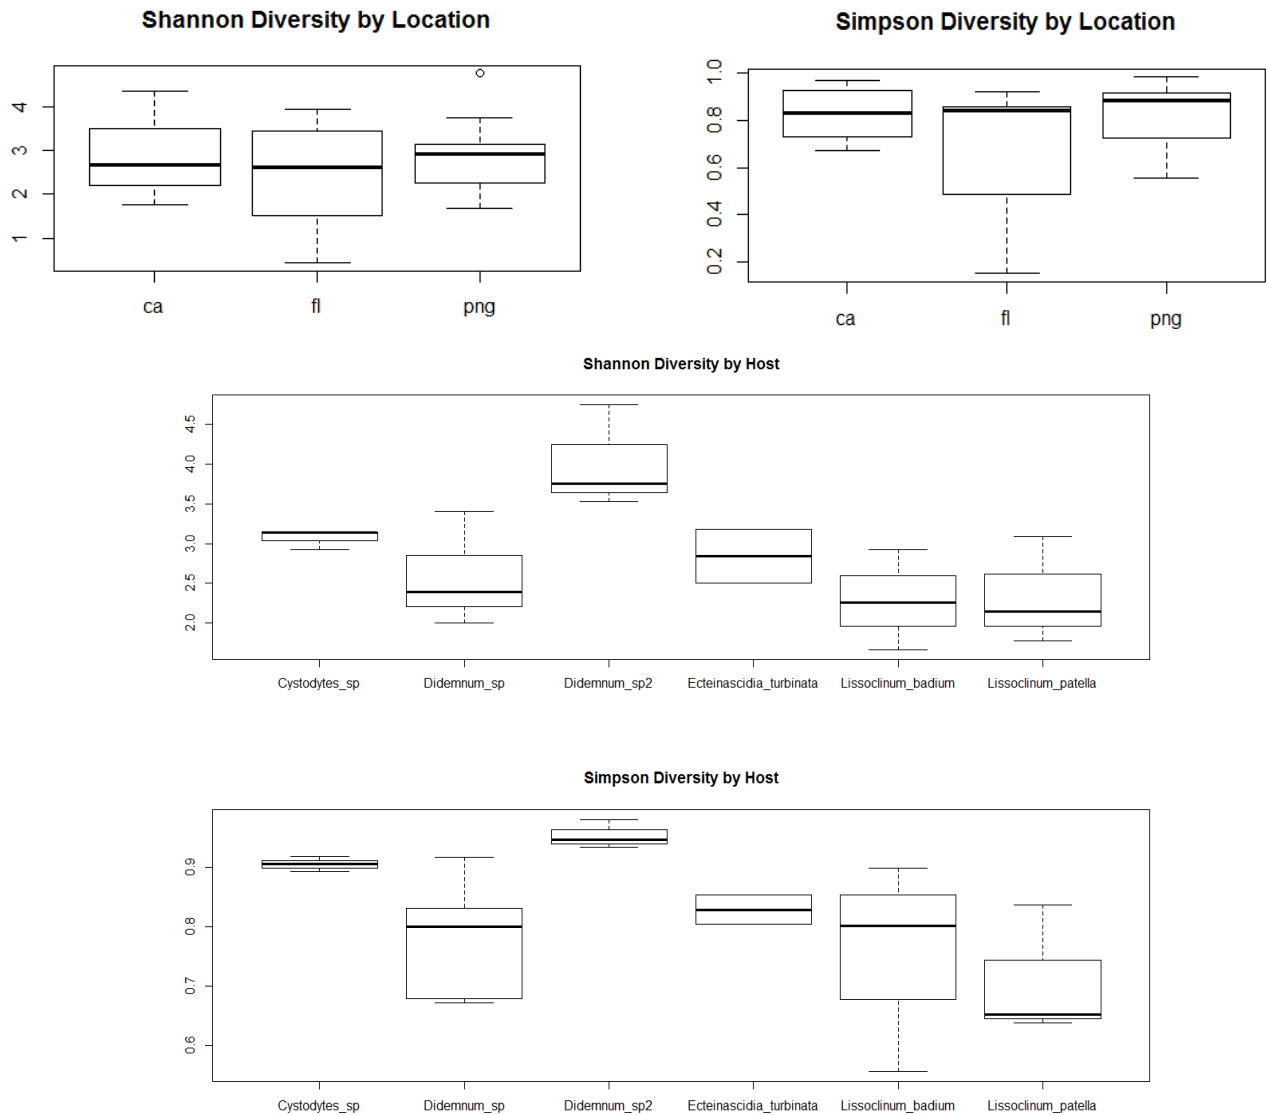

Supplement: ismej2014152x1.pdf [file ismej2014152x1.pdf]
