# Supplementary material
Source: PubMed Central journal article supplement (PMC4331574)
Supplement: ismej2014152x2.pdf [file ismej2014152x2.pdf]

## Species specificity of symbiosis and secondary metabolism in ascidians

Ma. Diarey B. Tianero, Jason C. Kwan, Thomas P. Wyche, Angela P. Presson, Michael Koch, Louis R. Barrows, Tim S. Bugni, Eric W. Schmidt

### Supplementary information index

**Methods S1.** DNA extraction

**Methods S2.** Processing and analysis of ascidian chemical extracts

**Methods S3.** LC-MS/MS analysis

**Methods S4.** Bioactivity assay

**Table S1.** Sample collection details and BLAST hits

**Table S2.** Microbiome statistics

**Table S3.** List of primers

**Table S4.** Alpha diversity indices

**Table S5.** Maps of host species categories for network-based analyses

**Table S6.** Tables of shared microbes in different locations and hosts

**Table S7.** List of eukaryotes associated with the ascidians

**Table S8.** Summary of ascidian secondary metabolites and associated microbes

**Table S9.** ANOSIM tests on ascidian subgroups

**Figure S1.** 18S rRNA phylogenetic tree of ascidians

**Figure S2.** Abundance and order-level taxonomic composition of *Deltaproteobacteria* and *Gammaproteobacteria* and phylogenetic trees of top 10 OTUs in *L. patella* and *E. turbinata* samples

**Figure S3.** Effects of seasonal variation on the composition of CA *Didemnum* sp. microbiomes

**Figure S4.** 3D Unifrac PCoA plots of all samples

**Figure S5.** PCA biplots of organic extracts

**Figure S6.** LC-MS/MS of representative lipid components

**Figure S7.** PCA biplot, LC-MS chromatograms, and mass spectra of secondary metabolites from PNG and VN

**Figure S8.** Bioactivity profile of ascidian extracts

**Figure S9.** Statistical comparison of diversity between location and hosts (SimBoot package calculations)

## **Methods S1**

*DNA extraction.* Ascidian tissue ( $\sim 0.5 \text{ cm}^3$ ) was ground in liquid nitrogen in sterile mortar and pestle. The powder obtained was resuspended in TE (5 mL) with lysozyme ( $2 \text{ mg ml}^{-1}$ ) and incubated at  $30 \text{ }^\circ\text{C}$  for 1 hour. EDTA (0.5 M, 1.2 mL) was added to the solution and gently mixed, after which proteinase K ( $0.2 \text{ mg mL}^{-1}$ , Qiagen) was added and the solution was incubated at  $30 \text{ }^\circ\text{C}$  for 5 minutes. For cell lysis, SDS (10%, 0.65 mL) was added and the solution was incubated at  $37 \text{ }^\circ\text{C}$  for 3-4 hours. After visibly complete lysis (clear solution), NaCl (5M, 1.2 mL) was added, mixed, and CTAB/NaCl (1 mL) solution was added before incubation at  $65 \text{ }^\circ\text{C}$  for 1 hour. Standard phenol/chloroform extraction was then performed (Sambrook and Russell 2006).

## **Methods S2**

*Processing and analysis of ascidian chemical extracts.* Each ascidian was extracted for 1 hour with methanol (5 mL), and the methanol was removed and dried under vacuum. Each extract was dissolved in methanol:water (1:9; 1.1 mL) and loaded into a Gilson GX-271 liquid handling system. Samples (0.9 mL) were subjected to automated SPE (ThermoFisher Scientific HyperSep C18, 50 mg absorbent mass, 1 mL reservoir volume), washed with  $\text{H}_2\text{O}$  (1 mL), and eluted with 95% methanol (1 mL) directly into an LC/MS-certified vial. Following SPE, each extract was quantified using an evaporative light-scattering detector (ELSD) according to previously published methods.(Adnani et al 2012) Each extract was diluted with 95% methanol to a concentration of 30 ng/mL.

## **Methods S3**

Representative samples from different locations were analyzed for putative lipid components on an Agilent MS 6520 Q-TOF mass spectrometer fitted to an Agilent 1290 UPLC. The extract components were separated on Acquity UPLC CSH C18 column ( $1.7 \text{ }\mu\text{M}$ , 2.1 X100 mm) using the

following gradient at 0.3 mL min<sup>-1</sup> (mobile phase A:B): t = 0, 85:15; t = 0-4 min, gradient to 70:30; t = 4-5, gradient to 48:52; t = 5-22, gradient to 18:82; t = 22-23, gradient to 1:99; t = 23-30, 1:99. Mobile phase A consisted of acetonitrile:water (60:40 v/v) in 10 mM ammonium formate and 0.1% formic acid, and mobile phase B consisted of isopropyl alcohol:water (90:10 v/v) in 10 mM ammonium formate and 0.1% formic acid. The column temperature was set to 65 °C. Acquisition was performed in positive ESI mode acquiring from *m/z* 100-1700. The mass spectrometer was operated using the following parameters: dry gas temperature, 350 °C; dry gas flow, 11.1 L/min; nebulizer pressure, 24 psig; Vcap, 5000V; fragmentor, 250 V. Additional parameters (precursors per cycle, 2; absolute threshold, 200) were used for data-dependent MS/MS.

#### **Methods S4**

*Antimicrobial broth dilution assays.* The assay was performed as previously described (Koch et al 2010) with the exception that four wells per compound were used for each dilution for MIC determination. DMSO served as a negative control. Bacterial strains used, along with the positive control antibiotic for each strain, were *M. tuberculosis* H37Ra ATCC 25177 (rifampicin); *E. coli* ATCC 25922 (gentamicin); *B. subtilis* ATCC 6633 (gentamicin); and *S. aureus* ATCC 25923 (gentamicin) and *C. albicans* ATCC 90028 (itraconazole).

*Cytotoxicity assay.* Cytotoxicity testing was performed using CEM-TART lymphoblastoid cells (Chen et al 1992) cultured in RPMI-1640 with 20% fetal bovine serum and antibiotic/antimycotic supplement at 37 °C with 5% CO<sub>2</sub> in moisture saturated atmosphere in 96-well culture clusters as previously described (Lin et al 2013).

**Table S1** : Sample collection details and 18S rRNA gene BLAST hits. \* Indicates codes used in preliminary taxonomic identification of samples.

| Code                                            | Collection Date | Collection Site, coordinates                  | BLAST hits, GenBank accession number               | % identity | 18S primers |
|-------------------------------------------------|-----------------|-----------------------------------------------|----------------------------------------------------|------------|-------------|
| CA_Ascidia_sp_4-19                              | 20-Feb-11       | Catalina Island, 33° 26.95' N, 118° 29.94' W  | <i>Ascidia ceratodes</i> , L12378.2                | 99         | F1/R1       |
| CA_Botryllus_sp_5-19                            | 12-Oct-11       | Catalina Harbor                               | <i>Botryllus planus</i> , DQ346653.1               | 99         | F3/R3       |
| CA_Didemnum_sp_4-17                             | 20-Feb-11       | Catalina Island, 33° 26.95' N, 118° 29.94' W  | <i>Didemnum molle</i> , AB211071.1                 | 94         | AscF2/AscR5 |
| CA_Didemnum_sp_4-2                              | 19-Feb-11       | Catalina Island, 33° 26.92' N, 118° 28.64' W  | <i>Didemnum molle</i> , AB211071.1                 | 92         | F3/R3       |
| CA_Didemnum_sp_4-7                              | 19-Feb-11       | Catalina Island, 33° 26.92' N, 118° 28.64' W  | <i>Didemnum</i> sp. DidSA/57, AB211072.1           | 92         | AscF2/AscR5 |
| CA_Didemnum_sp_5-1                              | 10-Oct-11       | Catalina Island, 33° 26.69' N, 118° 28.92' W  | <i>Didemnum</i> sp. DidSA/57, AB211072.1           | 92         | AscF2/AscR5 |
| CA_Didemnum_sp_5-11                             | 11-Oct-11       | Catalina Island, 33° 26.87' N, 118° 28.61' W  | <i>Didemnum molle</i> , AB211071.1                 | 94         | AscF2/AscR5 |
| CA_Didemnum_sp_5-18                             | 12-Oct-11       | Catalina Island, 33° 26.21' N, 118° 27.48' W  | <i>Didemnum molle</i> , AB211071.1                 | 90         | AscF2/AscR5 |
| CA_Pyura_sp_4-21                                | 19-Feb-11       | Catalina Island, 33° 26.67' N, 118° 29.417' W | <i>Pyura haustor</i> , AY903926.1                  | 99         | F3/R3       |
| CA_Styela_sp_5-16                               | 11-Oct-11       | Catalina Harbor                               | <i>Styela plicata</i> , L12444.2                   | 99         | F3/R3       |
| FJ_Lissoclinum_patella_06037                    |                 | Fiji, 17°55' S, 177°16' E                     | <i>Lissoclinum patella</i> , AB211085.1            | 99         | F1/R1       |
| FL_Didemnum_sp_TB3*( <i>D.psammathode</i> )     | 15-Aug-11       | Florida Keys, 24° 41.672' N, 81° 26.797' W    | <i>Didemnum</i> sp. Whangamata-EM-2003, AJ579861.1 | 89         | AscF2/AscR5 |
| FL_Ecteinascidia_turbinata_5                    | 10-Aug-11       | Florida Keys, 24° 39.591' N, 81° 25.217' W    | <i>Ecteinascidia turbinata</i> , FM244848.1        | 99         | F3/R3       |
| FL_Ecteinascidia_turbinata_TB2                  | 15-Aug-11       | Florida Keys, 24° 39.453' N, 81° 25.247' W    | <i>Ecteinascidia turbinata</i> , FM244848.1        | 99         | F3/R3       |
| FL_Eudistoma_sp_004*( <i>E.hepaticum</i> )      | 28-Oct-10       | Florida Keys, 24° 41.078' N, 81° 26.957' W    | <i>Eudistoma gilboviride</i> , AB211069.1          | 89         | AscF2/AscR5 |
| FL_Eudistoma_sp_TB1*( <i>E.olivaceum</i> )      | 1-Sep-11        | Florida Keys, 24° 41.685' N, 81° 26.840' W    | <i>Eudistoma gilboviride</i> , AB211069.1          | 95         | AscF2/AscR5 |
| FL_Tridentemnum_sp_001BB*( <i>T.orbicatum</i> ) | 11-Oct-10       | Florida Keys, 24° 37.487' N, 81° 27.443' W    | <i>Tridentemnum paracyclops</i> , AB211077.1       | 92         | F1/R1       |
| FL_Tridentemnum_sp_TB4*( <i>T.palmae</i> )      | 15-Aug-11       | Florida Keys, 24° 37.487' N, 81° 27.443' W    | <i>Tridentemnum paracyclops</i> , AB211077.1       | 92         | AscF2/AscR5 |
| PNG_Didemnum_sp_11038                           | 9-Nov-11        | Papua New Guinea, 10° 16' S, 145° 38' E       | <i>Didemnum molle</i> , AB211071.1                 | 94         | AscF2/AscR5 |
| PNG_Didemnum_sp_11055                           | 10-Nov-11       | Papua New Guinea, 10° 2' S, 145° 33' E        | <i>Didemnum</i> sp. DidSA/57, AB211072.1           | 95         | AscF2/AscR5 |
| PNG_Didemnum_sp_11089                           | 12-Nov-11       | Papua New Guinea, 9° 36' S, 147° 18' E        | <i>Didemnum molle</i> , AB211071.1                 | 94         | AscF2/AscR5 |
| PNG_Lissoclinum_patella_11033                   | 9-Nov-11        | Papua New Guinea, 10° 16' S, 145° 38' E       | <i>Lissoclinum patella</i> , AB211085.1            | 99         | F1/R1       |
| PNG_Lissoclinum_patella_11040                   | 9-Nov-11        | Papua New Guinea, 10° 16' S, 145° 38' E       | <i>Lissoclinum patella</i> , AB211085.1            | 99         | F1/R1       |
| PNG_Lissoclinum_vari_11047                      | 10-Nov-11       | Papua New Guinea, 10° 8' S, 145° 35' E        | <i>Lissoclinum badium</i> , AB211078.1             | 86         | F3/R3       |
| PNG_Lissoclinum_vari_11062                      | 11-Nov-11       | Papua New Guinea, 10° 2' S, 145° 32' E        | <i>Lissoclinum badium</i> , AB211078.1             | 86         | F3/R3       |
| PNG_Lissoclinum_vari_11068                      | 11-Nov-11       | Papua New Guinea, 10° 2' S, 145° 32' E        | <i>Lissoclinum badium</i> , AB211078.1             | 86         | F3/R3       |

|                                                         |           |                                           |                                              |    |                 |
|---------------------------------------------------------|-----------|-------------------------------------------|----------------------------------------------|----|-----------------|
| PNG_Lissoclinum_vare<br>au_11083                        | 12-Nov-11 | Papua New Guinea, 9° 35' S,<br>147° 17' E | <i>Lissoclinum badium</i> ,<br>AB211078.1    | 87 | F3/R3           |
| PNG_Lissoclinum_bistr<br>atum *( <i>L. voeltzkowi</i> ) | 05-Oct-07 | Papua New Guinea, 4° 8' S,<br>151° 34' E  | <i>Lissoclinum bistratum</i> ,<br>AB211084.1 | 99 | F1/R1           |
| VN_Cystodytes_sp_080<br>02                              | 28-Oct-08 | Vanuatu, 15° 32.496' S,<br>167° 12.895' E | <i>Cystodytes</i> sp., FM244842.1            | 94 | AscF2/<br>AscR5 |
| VN_Cystodytes_sp_080<br>19                              | 1-Nov-08  | Vanuatu, 15° 36.675' S, 167°<br>01.258' E | <i>Cystodytes</i> sp., FM244842.1            | 91 | AscF2/<br>AscR5 |
| VN_Cystodytes_sp_080<br>41                              | 4-Nov-08  | Vanuatu, 15° 25.416' S, 167°<br>12.476' E | <i>Cystodytes</i> sp., FM244842.1            | 94 | AscF2/<br>AscR5 |

**Table S2.** Microbiome statistics

|                                     |                |
|-------------------------------------|----------------|
| Number of tunicate samples          | 32             |
| Number of filtered reads            | 217073         |
| Number of 97 % OTUs                 | 3982           |
| Counts statistics (min/max/average) | 572/31660/6784 |
| OTUs statistics (min/max/average)   | 10/804/207     |

**Table S3.** List of primers used in this study

| Primer   | Sequence (5'-3')                  | Source                                 |
|----------|-----------------------------------|----------------------------------------|
| AscF1    | CTGGTTGATCCTGCCAG                 | Yokobori, 2006 (Yokobori et al 2006)   |
| AscR1    | CACCTACGGRWACCTTG                 | Yokobori, 2006 (Yokobori et al 2006)   |
| AscF3    | GATCCTGCCAGTAGTBATAT              | Yokobori, 2006 (Yokobori et al 2006)   |
| AscR3    | TGATCCTTCTGCAGGTTCA               | Yokobori, 2006 (Yokobori et al 2006)   |
| AscF2new | CAAGGAAGGCAGCAGGCGCAA<br>AT       | This study                             |
| AscR5new | GCGGTGTGTACAAAGGGCAGGGA           | This study                             |
| AscR3new | AAGGAATTGACGGAAGGGCACCA<br>CCAGGA | This study                             |
| 18S1     | CCTGGTTGATCCTGCCAG                | Tsagkogeorga, 2009 (Tsagkogeorga 2009) |
| 18S2     | TAATGATCCATCTGCAGG                | Tsagkogeorga, 2009 (Tsagkogeorga 2009) |
| 27F      | AGAGTTTGATCMTGGCTCAG              | Lane, 1991 (Lane 1991)                 |
| 1492R    | CGGTTACCTTGTTACGACTT              | Turner, 1999 (Turner et al 1999)       |
| 939F     | TTGACGGGGGCCCGCACAAG              | RTL in house primer                    |

**Table S4.** Sequence counts and alpha diversity values of ascidian microbiomes measured using different diversity indices.

| Sample                         | Counts | OTU | Shannon | Simpson | Chao1  |
|--------------------------------|--------|-----|---------|---------|--------|
| CA_Ascidia_sp_4-19             | 2213   | 248 | 6.19    | 0.96    | 255.40 |
| CA_Botryllus_sp_5-19           | 2406   | 220 | 5.68    | 0.94    | 229.67 |
| CA_Didemnum_sp_4-17            | 3992   | 136 | 3.27    | 0.77    | 156.53 |
| CA_Didemnum_sp_4-2             | 2959   | 106 | 2.87    | 0.68    | 117.12 |
| CA_Didemnum_sp_4-7             | 2681   | 160 | 4.09    | 0.82    | 168.22 |
| CA_Didemnum_sp_5-1             | 2478   | 170 | 4.86    | 0.92    | 182.00 |
| CA_Didemnum_sp_5-11            | 3312   | 140 | 3.59    | 0.83    | 167.04 |
| CA_Didemnum_sp_5-18            | 5068   | 149 | 3.15    | 0.67    | 152.89 |
| CA_Pyura_sp_4-21               | 2841   | 58  | 2.54    | 0.73    | 60.50  |
| CA_Styela_sp_5-16              | 2037   | 163 | 4.97    | 0.92    | 169.88 |
| FJ_Lissoclinum_patella_06037   | 1594   | 209 | 4.35    | 0.84    | 393.53 |
| FL_Didemnum_sp_tb3             | 7454   | 429 | 5.62    | 0.92    | 446.73 |
| FL_Ecteinascidia_turbinata_5   | 10015  | 234 | 3.60    | 0.80    | 268.55 |
| FL_Ecteinascidia_turbinata_tb2 | 31660  | 804 | 4.56    | 0.85    | 836.25 |
| FL_Eudistoma_sp_004            | 13886  | 41  | 0.78    | 0.17    | 50.00  |
| FL_Eudistoma_sp_tb1            | 12822  | 667 | 5.27    | 0.86    | 699.72 |
| FL_Tridentemnum_sp_001BB       | 1007   | 74  | 3.72    | 0.84    | 78.57  |
| FL_Tridentemnum_sp_tb4         | 572    | 10  | 0.61    | 0.15    | 10.25  |
| PNG_Didemnum_sp_11038          | 14155  | 166 | 5.09    | 0.93    | 178.55 |
| PNG_Didemnum_sp_11055          | 3372   | 290 | 6.79    | 0.98    | 300.44 |
| PNG_Didemnum_sp_11089          | 5585   | 236 | 5.38    | 0.95    | 241.70 |
| PNG_Lissoclinum_badium_11062   | 3916   | 92  | 4.20    | 0.90    | 98.18  |
| PNG_Lissoclinum_badium_11068   | 8993   | 104 | 3.24    | 0.80    | 108.62 |
| PNG_Lissoclinum_badium_11083   | 20324  | 278 | 2.40    | 0.56    | 284.36 |
| PNG_Lissoclinum_badium_11047   | 1899   | 44  | 3.25    | 0.81    | 48.50  |
| PNG_Lissoclinum_patella_11033  | 12851  | 347 | 3.08    | 0.65    | 368.72 |
| PNG_Lissoclinum_patella_11040  | 13778  | 186 | 2.55    | 0.64    | 195.60 |
| PNG_Lissoclinum_sp_7062        | 5528   | 114 | 4.39    | 0.88    | 121.00 |
| PNG_Lissoclinum_bistratum      | 11015  | 475 | 3.68    | 0.64    | 779.59 |
| VN_Cystodytes_sp_08002         | 2578   | 106 | 4.51    | 0.90    | 109.00 |
| VN_Cystodytes_sp_08019         | 1610   | 97  | 4.49    | 0.92    | 100.62 |
| VN_Cystodytes_sp_08041         | 2472   | 110 | 4.19    | 0.89    | 114.50 |

**Table S5.** Host species maps for networks analysis of ascidian microbiomes

| SampleName                     | map1                    | map2                    | map3                    | map4                    |      |
|--------------------------------|-------------------------|-------------------------|-------------------------|-------------------------|------|
| CA_Botrylloides_sp_5-19        | Botryllus               | Botryllus               | Botryllus               | Botryllus               |      |
| CA_Pyura_sp_4-21               | Pyura                   | Pyura                   | Pyura                   | Pyura                   |      |
| CA_Styela_sp_5-16              | Styela                  | Styela                  | Styela                  | Styela                  |      |
| FL_Ecteinascidia_turbinata_5   | Ecteinascidia_turbinata | Ecteinascidia_turbinata | Ecteinascidia_turbinata | Ecteinascidia_turbinata |      |
| FL_Ecteinascidia_turbinata_tb2 | Ecteinascidia_turbinata | Ecteinascidia_turbinata | Ecteinascidia_turbinata | Ecteinascidia_turbinata |      |
| CA_Ascidia_sp_4-19             | Ascidia                 | Ascidia                 | Ascidia                 | Ascidia                 |      |
| FL_Eudistoma_sp_004            | Eudistoma_sp_1          | Eudistoma_sp_1          | Eudistoma_sp_1          | Eudistoma_sp_1          |      |
| FL_Eudistoma_sp_tb1            | Eudistoma_sp_2          | Eudistoma_sp_2          | Eudistoma_sp_2          | Eudistoma_sp_2          |      |
| VN_Cystodytes_sp_08019         | Cystodytes_sp           | Cystodytes_sp_g2        |                         |                         |      |
| VN_Cystodytes_sp_08002         | Cystodytes_sp           | Cystodytes_sp_g1        |                         |                         |      |
| VN_Cystodytes_sp_08041         | Cystodytes_sp           | Cystodytes_sp_g1        |                         |                         |      |
| PNG_Lissoclinum_badium_11083   | Lissoclinum_badium      | Lissoclinum_badium_g1   |                         |                         |      |
| PNG_Lissoclinum_badium_11047   | Lissoclinum_badium      | Lissoclinum_badium_g2   |                         |                         |      |
| PNG_Lissoclinum_badium_11062   | Lissoclinum_badium      | Lissoclinum_badium_g2   |                         |                         |      |
| PNG_Lissoclinum_badium_11068   | Lissoclinum_badium      | Lissoclinum_badium_g2   |                         |                         |      |
| FL_Lissoclinum_patella_06037   | Lissoclinum_patella     | Lissoclinum_patella     | Lissoclinum_patella     | Lissoclinum_patella     |      |
| PNG_Lissoclinum_patella_11033  | Lissoclinum_patella     | Lissoclinum_patella     | Lissoclinum_patella     | Lissoclinum_patella     |      |
| PNG_Lissoclinum_patella_11040  | Lissoclinum_patella     | Lissoclinum_patella     | Lissoclinum_patella     | Lissoclinum_patella     |      |
| PNG_Lissoclinum_vareau_7062    | Lissoclinum_sp          | Lissoclinum_sp          | Lissoclinum_sp          | Lissoclinum_sp          |      |
| PNG_Lissoclinum_bistratum      | Lissoclinum_bistratum   | Lissoclinum_bistratum   | Lissoclinum_bistratum   | Lissoclinum_bistratum   |      |
| FL_Tridentemnum_sp_001BB       | Tridentemnum_sp_1       | Tridentemnum_sp_1       | Tridentemnum_sp_1       | Tridentemnum_sp_1       |      |
| FL_Tridentemnum_sp_tb4         | Tridentemnum_sp_2       | Tridentemnum_sp_2       | Tridentemnum_sp_2       | Tridentemnum_sp_2       |      |
| FL_Didemnum_sp_tb3             | Didemnum_sp             | Didemnum_sp_g1          | Didemnum_sp             | Didemnum_sp_g1          |      |
| PNG_Didemnum_sp_11089          | Didemnum_sp             | Didemnum_sp_g1          | Didemnum_sp             | Didemnum_sp_g1          |      |
| CA_Didemnum_sp_4-17            | Didemnum_sp             | Didemnum_sp_g1          | Didemnum_sp             | Didemnum_sp_g1          |      |
| CA_Didemnum_sp_4-2             | Didemnum_sp             | Didemnum_sp_g1          | Didemnum_sp             | Didemnum_sp_g1          |      |
| CA_Didemnum_sp_5-11            | Didemnum_sp             | Didemnum_sp_g1          | Didemnum_sp             | Didemnum_sp_g1          |      |
| CA_Didemnum_sp_5-18            | Didemnum_sp             | Didemnum_sp_g2          | Didemnum_sp             | Didemnum_sp_g2          |      |
| PNG_Didemnum_sp_11038          | Didemnum_sp             | Didemnum_sp_g2          | Didemnum_sp             | Didemnum_sp_g2          |      |
| PNG_Didemnum_sp_11055          | Didemnum_sp             | Didemnum_sp_g2          | Didemnum_sp             | Didemnum_sp_g2          |      |
| CA_Didemnum_sp_5-1             | Didemnum_sp             | Didemnum_sp_g2          | Didemnum_sp             | Didemnum_sp_g2          |      |
| CA_Didemnum_sp_4-7             | Didemnum_sp             | Didemnum_sp_g2          | Didemnum_sp             | Didemnum_sp_g2          |      |
| G(Host)                        |                         | 4.99                    | 2.18                    | 5.51                    | 2.42 |
| Pvalue                         |                         | 0.012                   | 0.099                   | 0.009                   | 0.05 |
| G(Location)                    |                         | 6.22                    | 6.22                    | 5.28                    | 5.28 |
| Pvalue                         |                         | 0.006                   | 0.006                   | 0.01                    | 0.01 |

**Table S6.** Table of shared microbes (top 10) in locations (A-C) and hosts species (D-F) and their percent abundance.

### A. California ascidians

| #OTU ID    | Consensus lineage                                                                              | Average % abundance in samples | Present in % samples |
|------------|------------------------------------------------------------------------------------------------|--------------------------------|----------------------|
| denovo3071 | Bacteria ;Proteobacteria ;Gammaproteobacteria ;Chromatiales ; ;                                | 0.16%                          | 70                   |
| denovo116  | Bacteria ;Proteobacteria ;Gammaproteobacteria ;Alteromonadales ;Alteromonadaceae ;Glaciecola ; | 0.10%                          | 60                   |
| denovo3294 | Bacteria ;Bacteroidetes ;Flavobacteriia ;Flavobacteriales ;Flavobacteriaceae                   | 0.15%                          | 60                   |
| denovo3389 | Bacteria ;Cyanobacteria ;Chloroplast ;Stramenopiles ; ;                                        | 0.09%                          | 60                   |
| denovo27   | Bacteria ;Bacteroidetes ;Flavobacteriia ;Flavobacteriales ;Flavobacteriaceae ; ;               | 0.06%                          | 50                   |
| denovo1982 | Bacteria ;Proteobacteria ;Alphaproteobacteria ;Rhizobiales                                     | 0.05%                          | 50                   |
| denovo2251 | Bacteria ;Acidobacteria ;Sva0725 ;Sva0725 ; ;                                                  | 0.21%                          | 50                   |
| denovo2984 | Bacteria ;Proteobacteria                                                                       | 0.06%                          | 50                   |
| denovo3340 | Bacteria ;Proteobacteria ;Gammaproteobacteria ;Alteromonadales ;OM60 ; ;                       | 0.04%                          | 50                   |

### B. Florida ascidians

| #OTU ID    | Consensus Lineage                                                                            | Average % abundance in samples | Present in % samples |
|------------|----------------------------------------------------------------------------------------------|--------------------------------|----------------------|
| denovo701  | Bacteria ;Proteobacteria ;Gammaproteobacteria                                                | 0.17%                          | 67                   |
| denovo766  | Bacteria ;Proteobacteria ;Gammaproteobacteria ;Vibrionales ;Vibrionaceae ;Vibrio             | 0.11%                          | 67                   |
| denovo1101 | Bacteria ;Proteobacteria ;Gammaproteobacteria                                                | 0.08%                          | 67                   |
| denovo1332 | Bacteria ;Proteobacteria ;Deltaproteobacteria ;Desulfobacteriales ;Desulfobulbaceae ;        | 0.08%                          | 67                   |
| denovo1589 | Bacteria ;Proteobacteria ;Gammaproteobacteria                                                | 7.31%                          | 67                   |
| denovo1834 | Bacteria                                                                                     | 0.38%                          | 67                   |
| denovo1931 | Bacteria ;Proteobacteria ;Gammaproteobacteria ;Oceanospirillales ;Litoricolaceae ;Litoricola | 0.38%                          | 67                   |
| denovo2290 | Bacteria ;Proteobacteria ;Gammaproteobacteria ;Xanthomonadales ; ;                           | 0.02%                          | 67                   |
| denovo2327 | Bacteria ;Proteobacteria ;Gammaproteobacteria                                                | 0.43%                          | 67                   |

### C. Papua New Guinea ascidians

| #OTU ID    | Consensus Lineage                                                                                   | Average % abundance in samples | Present in % samples |
|------------|-----------------------------------------------------------------------------------------------------|--------------------------------|----------------------|
| denovo866  | Bacteria ;Proteobacteria ;Gammaproteobacteria ;Alteromonadales ;Alteromonadaceae ;Alteromonas ;     | 0.30%                          | 42                   |
| denovo1357 | Bacteria ;Cyanobacteria ;Oscillatoriothycideae ;Chroococcales ;Prochloraceae ;Prochloron ;          | 2.85%                          | 42                   |
| denovo2569 | Bacteria ;Proteobacteria ;Alphaproteobacteria                                                       | 1.72%                          | 33                   |
| denovo2672 | Bacteria ;Proteobacteria ;Deltaproteobacteria ;Desulfobacteriales ;Nitrospinaceae ;Nitrospina ;     | 3.33%                          | 33                   |
| denovo2769 | Bacteria ;Proteobacteria ;Gammaproteobacteria ;Oceanospirillales ;Oceanospirillaceae ;Marinomonas ; | 0.04%                          | 33                   |
| denovo3942 | Bacteria ;Proteobacteria ;Deltaproteobacteria ;Sva0853 ; ;                                          | 9.92%                          | 33                   |
| denovo217  | Bacteria ;Bacteroidetes ;Sphingobacteriia ;Sphingobacteriales ;Ekhidnaceae ; ;                      | 0.10%                          | 25                   |
| denovo283  | Bacteria ;Proteobacteria ;Alphaproteobacteria ;Kordiimonadales ;Kordiimonadaceae ; ;                | 0.02%                          | 25                   |
| denovo352  | Bacteria                                                                                            | 0.09%                          | 25                   |

### D. *Lissoclinum patella* (group 1, Figure 3B)

| #OTU ID    | Consensus Lineage                                                                          | Average % abundance in samples | Present in % samples |
|------------|--------------------------------------------------------------------------------------------|--------------------------------|----------------------|
| denovo1567 | Bacteria ;Cyanobacteria ;Oscillatoriothycideae ;Chroococcales ;Prochloraceae ;Prochloron ; | 46.08%                         | 100                  |
| denovo2569 | Bacteria ;Proteobacteria ;Alphaproteobacteria                                              | 6.86%                          | 100                  |
| denovo2404 | Bacteria ;Proteobacteria ;Gammaproteobacteria                                              | 6.17%                          | 100                  |
| denovo1357 | Bacteria ;Cyanobacteria ;Oscillatoriothycideae ;Chroococcales ;Prochloraceae ;Prochloron ; | 10.76%                         | 100                  |
| denovo883  | Bacteria ;Proteobacteria ;Alphaproteobacteria                                              | 0.14%                          | 100                  |
| denovo832  | Bacteria ;Proteobacteria ;Alphaproteobacteria ;Rhodospirillales                            | 2.77%                          | 100                  |
| denovo1977 | Bacteria ;Cyanobacteria ;Chloroplast ;Stramenopiles ; ;                                    | 0.12%                          | 100                  |
| denovo231  | Bacteria ;Cyanobacteria ;Oscillatoriothycideae ;Chroococcales ;Prochloraceae ;Prochloron ; | 0.10%                          | 100                  |
| denovo3369 | Bacteria ;Cyanobacteria ;Oscillatoriothycideae ;Chroococcales ;Prochloraceae ;Prochloron ; | 0.34%                          | 100                  |



### E. *Lissoclinum badium* (group 2, Figure 3B)

| #OTU ID    | Consensus lineage                                                                               | Average % abundance in samples | Present in % samples |
|------------|-------------------------------------------------------------------------------------------------|--------------------------------|----------------------|
| denovo3942 | Bacteria ;Proteobacteria ;Deltaproteobacteria ;Sva0853 ; ;                                      | 39.67%                         | 75                   |
| denovo3967 | Bacteria ;Proteobacteria ;Alphaproteobacteria                                                   | 4.08%                          | 75                   |
| denovo1567 | Bacteria ;Cyanobacteria ;Oscillatoriothycideae ;Chroococcales ;Prochloraceae ;Prochloron ;      | 2.52%                          | 75                   |
| denovo2672 | Bacteria ;Proteobacteria ;Deltaproteobacteria ;Desulfobacterales ;Nitrospinaeae ;Nitrospina ;   | 9.99%                          | 75                   |
| denovo279  | Bacteria ;Proteobacteria                                                                        | 1.81%                          | 75                   |
| denovo1477 | Bacteria ;Proteobacteria ;Alphaproteobacteria ;Rhizobiales ;Phyllobacteriaceae ;Mesorhizobium ; | 2.98%                          | 75                   |
| denovo1436 | Bacteria ;Proteobacteria ;Gammaproteobacteria                                                   | 0.78%                          | 75                   |
| denovo3289 | Bacteria                                                                                        | 0.72%                          | 75                   |
| denovo2829 | Bacteria ;Proteobacteria ;Alphaproteobacteria ;Kordiimonadales ;Kordiimonadaceae ; ;            | 0.50%                          | 75                   |

### F. *Didemnum* sp. (group 3, Figure 3B)

| #OTU ID    | Consensus lineage                                                                                    | Average % abundance in samples | Present in % samples |
|------------|------------------------------------------------------------------------------------------------------|--------------------------------|----------------------|
| denovo2476 | Bacteria ;Proteobacteria ;Alphaproteobacteria                                                        | 17.42%                         | 100                  |
| denovo2071 | Bacteria ;Proteobacteria ;Gammaproteobacteria ;Pseudomonadales ;Pseudomonadaceae ;Pseudomonas        | 4.20%                          | 100                  |
| denovo1698 | Bacteria ;Proteobacteria ;Deltaproteobacteria ;Bdellovibrionales ;Bdellovibrionaceae ;Bdellovibrio ; | 1.11%                          | 100                  |
| denovo42   | Bacteria ;Proteobacteria ;Gammaproteobacteria ;Pseudomonadales ;Pseudomonadaceae                     | 0.18%                          | 100                  |
| denovo2984 | Bacteria ;Proteobacteria                                                                             | 0.13%                          | 100                  |
| denovo1982 | Bacteria ;Proteobacteria ;Alphaproteobacteria ;Rhizobiales                                           | 0.09%                          | 100                  |
| denovo3206 | Bacteria ;Proteobacteria ;Gammaproteobacteria ;Oceanospirillales ;Endozoicimonaceae ; ;              | 0.15%                          | 75                   |
| denovo980  | Bacteria ;Proteobacteria ;Gammaproteobacteria                                                        | 0.04%                          | 75                   |
| denovo3508 | Bacteria ;Proteobacteria ;Gammaproteobacteria                                                        | 0.12%                          | 75                   |

**Table S7.** BLAST hits of 18S rRNA sequences of eukaryotes associated with ascidians

| <b>Ascidian sample</b>      | <b>Symbiotic eukaryote</b>                     | <b>Genbank accession number</b> |
|-----------------------------|------------------------------------------------|---------------------------------|
| <i>Eudistoma</i> sp. 004    | <i>Aiptasia mutabilis</i>                      | FJ489438.1                      |
|                             | <i>Prostheceraeus vittatus</i>                 | AJ312272.1                      |
|                             | <i>Aiptasia pulchella</i>                      | AY297437.1                      |
| <i>Didemnum</i> sp. 4-7     | <i>Grateloupia luxurians</i>                   | U33132.1                        |
| <i>Didemnum</i> sp. 4-17    | <i>Clytia gracilis</i>                         | DQ068053.1                      |
|                             | <i>Clytia</i> sp. AGC-200                      | AF358074.1                      |
| <i>Didemnum</i> sp. 5-1     | <i>Baeria nivea</i>                            | AF182191.1                      |
| <i>Didemnum</i> sp. 5-11    | <i>Selaginopsis cornigera</i>                  | Z92899.1                        |
|                             | Uncultured eukaryote clone SS1 E 02 11         | EU050966.1                      |
| <i>Didemnum</i> sp. 5-18    | <i>Igernella notabilis</i>                     | EU702420.1                      |
|                             | <i>Rhacostoma atlantica</i>                    | EU305501.1                      |
|                             | <i>Melicertum octocostatum</i>                 | AY920757.1                      |
| <i>Cystodytes</i> sp. 08002 | <i>Lankesteria ascidia</i>                     | JX187607.1                      |
|                             | Uncultured eukaryote clone SS1 E 02 1          | EU050966.1                      |
| <i>Cystodytes</i> sp. 08019 | <i>Corallochytrium limacisporum</i>            | L42528.1                        |
|                             | <i>Notodelphys prasina</i>                     | JF781536.1                      |
|                             | <i>Cyclopina gracilis</i>                      | JF781537.1                      |
| <i>Cystodytes</i> sp. 08041 | <i>Symbiodinium</i> sp.                        | AY165766.1                      |
|                             | <i>Notodelphys prasina</i>                     | JF781536.1                      |
|                             | <i>Lankesteria ascidia</i>                     | JX187607.1                      |
| <i>Didemnum</i> sp. 11038   | Uncultured eukaryote clone CC02A105.033        | KF031747.1                      |
|                             | <i>Cyclopina gracilis</i>                      | JF781537.1                      |
|                             | <i>Doridicola agilis</i>                       | JF781541.1                      |
| <i>Didemnum</i> sp. 11055   | <i>Cyclopina gracilis</i>                      | F781537.1                       |
|                             | <i>Anticomidae</i> sp. JCC29                   | HM564572.1                      |
| <i>Didemnum</i> sp.11089    | <i>Melicertum octocostatum</i>                 | AY920757.1                      |
|                             | <i>Dictyota</i> sp. YMGTB002                   | AB087109.1                      |
|                             | Uncultured alveolate                           | FN263032.1                      |
| <i>Eudistoma</i> sp. TB1    | <i>Calomicrolaimus parahonestus</i>            | AY854218.1                      |
|                             | <i>Sycettusa</i> aff. <i>hastifera</i> OV-2012 | JQ272322.1                      |
|                             | <i>Spongia tubulifera</i>                      | KC902150.1                      |
|                             | <i>Grantessa</i> sp. OV-2012 voucher GW979     | JQ272312.1                      |
| <i>Didemnum</i> sp. TB3     | <i>Posidonia australis</i>                     | GQ497582.1                      |
|                             | <i>Spyridia filamentosa</i>                    | EU718707.1                      |
|                             | <i>Attheyella crassa</i>                       | EU380307.1                      |
| <i>Trididemnum</i> sp. TB4  | <i>Biemna fistulosa</i>                        | FR819688.1                      |
|                             | <i>Thelepus crispus</i>                        | JN936473.1                      |
|                             | <i>Euplotes charon</i> voucher JJM08102201     | JF694043.1                      |

**Table S8.** Summary of secondary metabolites and associated microbes in ascidians from this data set and related species.

| Sample Code                        | Host Taxonomy                  | Location         | Major associated secondary metabolites | Major symbiont characterized                                      | Previous microbiome analysis of related species       |
|------------------------------------|--------------------------------|------------------|----------------------------------------|-------------------------------------------------------------------|-------------------------------------------------------|
| CA_Ascidia_sp_4-19                 | <i>Ascidia ceratodes</i>       | California       |                                        |                                                                   |                                                       |
| CA_Botryllus_sp_5-19               | <i>Botryllus planus</i>        | California       |                                        |                                                                   |                                                       |
| CA_Didemnum_sp_4-17                | <i>Didemnum</i> sp.            | California       |                                        |                                                                   |                                                       |
| CA_Didemnum_sp_4-2                 | <i>Didemnum</i> sp.            | California       |                                        |                                                                   |                                                       |
| CA_Didemnum_sp_4-7                 | <i>Didemnum</i> sp.            | California       |                                        |                                                                   |                                                       |
| CA_Didemnum_sp_5-1                 | <i>Didemnum</i> sp.            | California       |                                        |                                                                   |                                                       |
| CA_Didemnum_sp_5-11                | <i>Didemnum</i> sp.            | California       |                                        |                                                                   |                                                       |
| CA_Didemnum_sp_5-18                | <i>Didemnum molle</i>          | California       |                                        |                                                                   |                                                       |
| CA_Pyura_sp_4-21                   | <i>Pyura haustor</i>           | California       |                                        |                                                                   |                                                       |
| CA_Styela_sp_5-16                  | <i>Styela plicata</i>          | California       | plicatamide                            |                                                                   | Erwin et al, 2013                                     |
| FL_Didemnum_sp_tb3                 | <i>Didemnum</i> sp.            | Florida          |                                        |                                                                   |                                                       |
| FL_Ecteinascidia_turbinata_5       | <i>Ecteinascidia turbinata</i> | Florida          | ecteinascidins                         | <i>Ca.</i><br>Endolisoclinum frumentensis                         | Rath 2011, Perez 2007, Moss 2003                      |
| FL_Ecteinascidia_turbinata_t<br>b2 | <i>Ecteinascidia turbinata</i> | Florida          | ecteinascidins                         | <i>Ca.</i><br>Endolisoclinum frumentensis                         | Rath 2011, Perez 2007, Moss 2003                      |
| FL_Eudistoma_sp_004                | <i>Eudistoma</i> sp.           | Florida          | eudistomins                            |                                                                   |                                                       |
| FL_Eudistoma_sp_tb1                | <i>Eudistoma</i> sp.           | Florida          | eudistomins                            |                                                                   |                                                       |
| FL_Tridentium_sp_001BB             | <i>Tridentium</i> sp.          | Florida          |                                        |                                                                   |                                                       |
| FL_Tridentium_sp_tb4               | <i>Tridentium</i> sp.          | Florida          |                                        |                                                                   |                                                       |
| PNG_Didemnum_sp_11038              | <i>Didemnum</i> sp.            | Papua New Guinea |                                        |                                                                   |                                                       |
| PNG_Didemnum_sp_11055              | <i>Didemnum</i> sp.            | Papua New Guinea |                                        |                                                                   |                                                       |
| PNG_Didemnum_sp_11089              | <i>Didemnum</i> sp.            | Papua New Guinea |                                        |                                                                   |                                                       |
| PNG_Lissoclinum_patella_11<br>033  | <i>Lissoclinum patella</i>     | Papua New Guinea | cyanobactins,<br>patellazoles          | <i>Prochloron</i> spp.,<br><i>Ca.</i><br>Endolisoclinum faulkneri | Schmidt 2005, Donia 2008,<br>Kwan 2012, Behrendt 2012 |
| PNG_Lissoclinum_patella_11<br>040  | <i>Lissoclinum patella</i>     | Papua New Guinea | cyanobactins,<br>patellazoles          | <i>Prochloron</i> spp.,                                           | Schmidt 2005, Donia 2008,<br>Kwan 2012, Behrendt 2012 |
| FJ_Lissoclinum_patella_0603<br>7   | <i>Lissoclinum patella</i>     | Fiji             | cyanobactins,<br>patellazoles          | <i>Prochloron</i> spp.,<br><i>Ca.</i><br>Endolisoclinum faulkneri | Schmidt 2005, Donia 2008,<br>Kwan 2012, Behrendt 2012 |
| PNG_Lissoclinum_sp_7062            | <i>Lissoclinum</i> sp.         | Papua New Guinea |                                        |                                                                   |                                                       |
| PNG_Lissoclinum_badium_1<br>1047   | <i>Lissoclinum badium</i>      | Papua New Guinea | pyridoacridine<br>alkaloids            | <i>Nitrospina</i> sp.                                             | Erwin 2013                                            |
| PNG_Lissoclinum_badium_1           | <i>Lissoclinum</i>             | Papua New        | pyridoacridine                         | <i>Nitrospina</i> sp.                                             | Erwin 2013                                            |

|                                  |                                  |                     |                              |                         |            |
|----------------------------------|----------------------------------|---------------------|------------------------------|-------------------------|------------|
| 1062                             | <i>badium</i>                    | Guinea              | alkaloids                    |                         |            |
| PNG_Lissoclinum_badium_1<br>1068 | <i>Lissoclinum<br/>badium</i>    | Papua New<br>Guinea | pyridoacridine<br>alkaloids  | <i>Nitrospina</i> sp.   | Erwin 2013 |
| PNG_Lissoclinum_badium_1<br>1083 | <i>Lissoclinum<br/>badium</i>    | Papua New<br>Guinea | pyridoacridine<br>alkaloids  | <i>Nitrospina</i> sp.   | Erwin 2013 |
| PNG_Lissoclinum_bistratum        | <i>Lissoclinum<br/>bistratum</i> | Papua New<br>Guinea | cyanobactins,<br>bistramides | <i>Prochloron</i> spp., |            |
| VN_Cystodytes_sp_08002           | <i>Cystodytes</i> sp.            | Vanuatu             | pyridoacridine<br>alkaloids  |                         |            |
| VN_Cystodytes_sp_08019           | <i>Cystodytes</i> sp.            | Vanuatu             | pyridoacridine<br>alkaloids  |                         |            |
| VN_Cystodytes_sp_08041           | <i>Cystodytes</i> sp.            | Vanuatu             | pyridoacridine<br>alkaloids  |                         |            |

**Table S9.** Statistical comparisons of ascidian microbiomes across species, and within the same species across locations and over time (at the same location). There was a statistically significant difference in ascidian microbiomes across species, and within the same species across locations, but no difference in microbiomes within a species collected at two different time points. Analyses were performed only on groups with a minimum of two samples using the ANOSIM method in the vegan R package (ANOSIM R, P-value1) with 100,000 permutations. A sensitivity analysis was performed using a second permutation ANOVA method "adonis" also available in vegan (R<sup>2</sup>, P-value2).

| Samples/Groups                    | # Samples | ANOSIM R      | P-value1     | R <sup>2</sup> | P-value2     |
|-----------------------------------|-----------|---------------|--------------|----------------|--------------|
| <b>All Papua New Guinea</b>       | <b>11</b> | <b>0.762</b>  | <b>0.002</b> | <b>0.426</b>   | <b>0.002</b> |
| <i>Didemnum</i>                   | 3         |               |              |                |              |
| <i>Lissoclinum_badium</i>         | 4         |               |              |                |              |
| <i>Lissoclinum_patella</i>        | 2         |               |              |                |              |
| <b>All <i>Didemnum</i></b>        | <b>9</b>  | <b>0.846</b>  | <b>0.011</b> | <b>0.252</b>   | <b>0.012</b> |
| Papua New Guinea                  | 3         |               |              |                |              |
| California                        | 6         |               |              |                |              |
| <b>California <i>Didemnum</i></b> | <b>6</b>  | <b>-0.037</b> | <b>0.499</b> | <b>0.171</b>   | <b>0.701</b> |
| Fall collection                   | 3         |               |              |                |              |
| Spring collection                 | 3         |               |              |                |              |

References:

- Adnani N, Michel CR, Bugni TS (2012). Universal quantification of structurally diverse natural products using an evaporative light scattering detector. *J Nat Prod* **75**: 802-806.
- Chen H, Boyle TJ, Malim MH, Cullen BR, Lyerly HK (1992). Derivation of a biologically contained replication system for human immunodeficiency virus type 1. *Proc Natl Acad Sci U S A* **89**: 7678-7682.
- Koch M, Bugni TS, Sondossi M, Ireland CM, Barrows LR (2010). Exocarpic acid inhibits mycolic acid biosynthesis in *Mycobacterium tuberculosis*. *Planta Med* **76**: 1678-1682.
- Lane DJ (1991). 16S/23S rRNA sequencing. In: Stackebrandt E, Goodfellow, M. (ed). *Nucleic acid techniques in bacterial systematics*. John Wiley and Sons: New York. pp 115-175.
- Lin Z, Koch M, Pond CD, Mabeza G, Seronay RA, Concepcion GP *et al* (2013). Structure and activity of lobophorins from a turrid mollusk-associated *Streptomyces* sp. *J Antibiot (Tokyo)*.
- Sambrook J, Russell DW (2006). Purification of nucleic acids by extraction with phenol:chloroform. *CSH Protoc* **2006**.
- Tsagkogeorga G, Turon X, Hopcroft RH, Tilak MK, Feldstein T, Shenkar N, Loya Y, Huchon D, Douzery EJP, Delsuc F (2009). An updated 18S rRNA phylogeny of tunicates based on mixture and secondary structure models. *BMC Evol Biol* **9**.
- Turner S, Pryer KM, Miao VPW, Palmer JD (1999). Investigating Deep Phylogenetic Relationships among Cyanobacteria and Plastids by Small Subunit rRNA Sequence Analysis 1. *J Eukaryot Microbiol* **46**: 327-338.
- Yokobori S, Kurabayashi A, Neilan BA, Maruyama T, Hirose E (2006). Multiple origins of the ascidian-Prochloron symbiosis: molecular phylogeny of photosymbiotic and non-symbiotic colonial ascidians inferred from 18S rDNA sequences. *Mol Phylogenet Evol* **40**: 8-19.
